# Supplementary material
Source: PubMed Central journal article supplement (PMC8829750)
Supplement: jamapsychiatry-e214331-s001.pdf [file jamapsychiatry-e214331-s001.pdf]

## Supplemental Online Content

Yip SW, Jordan A, Kohler RJ, Holmes A, Bzdok D. Multivariate, transgenerational associations of the COVID-19 pandemic across minoritized and marginalized communities. *JAMA Psychiatry*. Published online February 9, 2022. doi:10.1001/jamapsychiatry.2021.4331

### **eMethods**

**eTable 1.** Demographic characteristics of youth with and without COVID-19 assessment data

**eTable 2.** ABCD Child COVID-19 Assessments

**eTable 3.** ABCD Parent COVID-19 Assessments

**eTable 4.** Top 20 Loadings Mode 1 ABCD Baseline

**eTable 5.** Top 20 Loadings Mode 1 COVID Baseline

**eTable 6.** Top 20 Loadings Mode 2 ABCD Baseline

**eTable 7.** Top 20 Loadings Mode 2 COVID Baseline

**eTable 8.** Top 10 Loadings Mode 3 ABCD Baseline

**eTable 9.** Top 10 Loadings Mode 3 COVID Baseline

**eTable 10.** Top 10 Loadings Mode 4 ABCD Baseline

**eTable 11.** Top 10 Loadings Mode 4 COVID Baseline

**eTable 12.** Top 10 Loadings Mode 5 ABCD Baseline

**eTable 13.** Top 10 Loadings Mode 5 COVID Baseline

**eTable 14.** Top 10 Loadings Mode 6 ABCD Baseline

**eTable 15.** Top 10 Loadings Mode 6 COVID Baseline

**eTable 16.** Top 10 Loadings Mode 7 ABCD Baseline

**eTable 17.** Top 10 Loadings Mode 7 COVID Baseline

**eTable 18.** Top 10 Loadings Mode 8 ABCD Baseline

**eTable 19.** Top 10 Loadings Mode 8 COVID Baseline

**eTable 20.** Top 10 Loadings Mode 9 ABCD Baseline

**eTable 21.** Top 10 Loadings Mode 9 COVID Baseline

### **eReferences**

This supplemental material has been provided by the authors to give readers additional information about their work.

## **eMethods**

### *ABCD population cohort overview*

The first wave of the ABCD collection offered profiling from 11,875 children aged 9-10 from 21 different sites located in 17 different states, collected from 2016 to 2018. The ABCD initiative was specifically intended to be a cohort that is diverse in gender, race and ethnicity, socioeconomic status, and urbanicity<sup>1</sup>. Primary exclusion criteria include major medical or neurological conditions, gestational age <28 weeks or birthweight below 1200g, magnetic resonance imaging (MRI) contraindications, having a parent who is not fluent in English or Spanish, history of traumatic brain injury, current diagnosis of schizophrenia, moderate/severe autism spectrum disorder, intellectual disability or substance use disorder at enrollment. Participants undergo comprehensive biennial assessments, as well as more limited interim assessments, across 10 years. ABCD Wave I and COVID-19 data were downloaded via the National Institute of Mental Health Data Archive (Data Archive Recipient #6089).

### *Baseline characteristic of the family system: pre-pandemic assessments*

ABCD's baseline assessment includes comprehensive measures across child and parent domains: demographic and socioeconomic measures; measures of child mental health (e.g., Parent Child Behavior Checklist) and substance use; detailed family histories; trait measures of child personality and temperament (e.g., impulsivity scales); neurocognitive performance; child behaviors (e.g., digital media use, involvement in sports); child physical development; and child culture and environment (e.g., acculturation scales and family environment scales)<sup>1-6</sup>. These and other indicators were captured at baseline using >6,000 deep profiling assessments (corresponding to >17,000 individual items). All these measures—together defining baseline, pre-pandemic family features—were entered into our multivariate pattern analysis (additional details in analysis section below). A complete list of ABCD assessments can be found at <https://abcdstudy.org/scientists/protocols/>. For additional details on ABCD protocol development and procedures, see<sup>1-6</sup>. Demographic characteristics are shown in eTable 1, below.

### *Mid-pandemic characteristics of the family system: COVID-19 assessments*

Complete COVID-19 questionnaires are provided in eTables 2 & 3, below.

eTable 1 – Demographic characteristics of youth with and without COVID-19 assessment data

| Characteristic                | Total<br>(N=11,875) | COVID-19 data<br>(N=9,267) | No COVID-19 data<br>(N=2,608) |
|-------------------------------|---------------------|----------------------------|-------------------------------|
| Age (months), mean(SD)[range] | 118.98 (7.50)       | 118.96 (7.49)              | 119.05 (7.50)                 |
| Sex, N(%)                     |                     |                            |                               |
| Male                          | 52.16%              | 52.20%                     | 52.05%                        |
| Female                        | 47.84%              | 47.80%                     | 47.95%                        |
| Race, N(%)                    |                     |                            |                               |
| White                         | 63.35%              | 68.11%                     | 50.47%                        |
| Black                         | 15.73%              | 12.57%                     | 28.21%                        |
| Asian                         | 2.32%               | 2.52%                      | 1.77%                         |
| AIAN/NHPI                     | 0.66%               | 0.51%                      | 1.22%                         |
| Other                         | 4.42%               | 3.87%                      | 6.69%                         |
| Mixed                         | 12.07%              | 12.42%                     | 11.64%                        |
| Parent Education, N(%)        |                     |                            |                               |
| < HS diploma                  | 2.50%               | 1.52%                      | 5.98%                         |
| HS diploma/GED                | 4.77%               | 3.74%                      | 8.44%                         |
| Some college                  | 12.98%              | 11.60%                     | 17.87%                        |
| Bachelor                      | 12.71%              | 13.88%                     | 8.53%                         |
| Post grad degree              | 17.04%              | 19.26%                     | 9.18%                         |
| Household income, N(%)        |                     |                            |                               |
| <50K                          | 14.84%              | 12.12%                     | 25.27%                        |
| >=50K and <100K               | 14.14%              | 14.82%                     | 11.54%                        |
| >100K                         | 21.02%              | 23.06%                     | 13.19%                        |

**eTable 2** – ABCD Child COVID-19 Assessments

|                          |                                                                                                                                                                                                   |
|--------------------------|---------------------------------------------------------------------------------------------------------------------------------------------------------------------------------------------------|
| subjectkey               | The NDAR Global Unique Identifier (GUID) for research subject                                                                                                                                     |
| src_subject_id           | Subject ID how it's defined in lab/project                                                                                                                                                        |
| interview_date           | Date on which the interview/genetic test/sampling/imaging/biospecimen was completed.<br>MM/DD/YYYY                                                                                                |
| interview_age            | Age in months at the time of the interview/test/sampling/imaging.                                                                                                                                 |
| sex                      | Sex of the subject                                                                                                                                                                                |
| eventname                | The event name for which the data was collected                                                                                                                                                   |
| afraid_against_mask_2_cv | How did you feel when you scrolled, wrote, or posted to social media (e.g., Facebook, Instagram, Twitter, Snapchat, TikTok) about the demonstrations against wearing masks? : Afraid:             |
| afraid_anti_mask         | How did you feel when you saw or heard about the demonstrations on the TV, internet, or radio against wearing masks? Afraid:                                                                      |
| afraid_anti_mask_4_cv    | How did you feel when you attended the in-person demonstrations against wearing masks? Afraid:                                                                                                    |
| afraid_blm_2_cv          | How did you feel when you scrolled, wrote, or posted to social media (e.g., Facebook, Instagram, Twitter, Snapchat, TikTok) about the demonstrations for Black Lives Matter? Afraid:              |
| afraid_blm_4_cv          | How did you feel when you attended the in-person demonstrations for Black Lives Matter? Afraid:                                                                                                   |
| afraid_blm_cv            | How did you feel when you saw or heard about the demonstrations on the TV, internet, or radio for Black Lives Matter? Afraid:                                                                     |
| afraid_pro_po_2_cv       | How did you feel when you scrolled, wrote, or posted to social media (e.g., Facebook, Instagram, Twitter, Snapchat, TikTok) about the demonstrations for support for police (pro-police)? Afraid: |
| afraid_pro_po_4_cv       | How did you feel when you attended the in-person demonstrations for pro-police? Afraid:                                                                                                           |
| afraid_pro_po_cv         | How did you feel when you saw or heard about the demonstrations on the TV, internet, or radio for support for police (pro-police)? Afraid:                                                        |
| afraid_reopen_bus_2_cv   | How did you feel when you scrolled, wrote, or posted to social media (e.g., Facebook, Instagram, Twitter, Snapchat, TikTok) about the demonstrations for reopening of businesses? Afraid:         |
| afraid_reopen_bus_4_cv   | How did you feel when you attended the in-person demonstrations for reopening of businesses? Afraid:                                                                                              |
| afraid_reopen_bus_cv     | How did you feel when you saw or heard about the demonstrations on the TV, internet, or radio for reopening of businesses? Afraid:                                                                |

|                                  |                                                                                                                                                                                                         |
|----------------------------------|---------------------------------------------------------------------------------------------------------------------------------------------------------------------------------------------------------|
| against_mask_social_medi<br>a_cv | Since April 2020, how often did you scroll, write, or post to social media (e.g., Facebook, Instagram, Twitter, Snapchat, TikTok) about the demonstrations for against wearing mask?                    |
| against_mask_time_cv             | Since April 2020, how much time did you spend, on average, watching TV stories, looking on the internet, or listening to news on the radio about demonstrations against wearing masks?                  |
| angry_against_mask_2_cv          | How did you feel when you scrolled, wrote, or posted to social media (e.g., Facebook, Instagram, Twitter, Snapchat, TikTok) about the demonstrations against wearing masks? :Angry:                     |
| angry_anti_mask_4_cv             | How did you feel when you attended the in-person demonstrations against wearing masks? Angry:                                                                                                           |
| angry_anti_mask_cv               | How did you feel having your parent(s) attend the against wearing masks demonstration(s) without you? Angry:                                                                                            |
| angry_blm_2_cv                   | How did you feel when you scrolled, wrote, or posted to social media (e.g., Facebook, Instagram, Twitter, Snapchat, TikTok) about the demonstrations for Black Lives Matter? Angry:                     |
| angry_blm_4_cv                   | How did you feel when you attended the in-person demonstrations for Black Lives Matter? Angry:                                                                                                          |
| angry_blm_cv                     | How did you feel when you saw or heard about the demonstrations on the TV, internet, or radio for Black Lives Matter? Angry:                                                                            |
| angry_pro_po_2_cv                | How did you feel when you scrolled, wrote, or posted to social media (e.g., Facebook, Instagram, Twitter, Snapchat, TikTok) about the demonstrations for support for police (pro-police)? Angry:        |
| angry_pro_po_4_cv                | How did you feel when you attended the in-person demonstrations for pro-police? Angry:                                                                                                                  |
| angry_pro_po_cv                  | How did you feel when you saw or heard about the demonstrations on the TV, internet, or radio for support for police (pro-police)? Angry:                                                               |
| angry_reopen_bus_2_cv            | How did you feel when you scrolled, wrote, or posted to social media (e.g., Facebook, Instagram, Twitter, Snapchat, TikTok) about the demonstrations for reopening of businesses? Angry:                |
| angry_reopen_bus_4_cv            | How did you feel when you attended the in-person demonstrations for reopening of businesses?Angry:                                                                                                      |
| angry_reopen_bus_cv              | How did you feel when you saw or heard about the demonstrations on the TV, internet, or radio for reopening of businesses? Angry:                                                                       |
| anti_mask_2_cv                   | Since April 2020, did you scroll, write, or post to social media (e.g., Facebook, Instagram, Twitter, Snapchat, TikTok) about the demonstrations (public marches, rallies) for: : Against wearing masks |
| anti_mask_3_cv                   | Since April 2020, do you know people who attended a public demonstration (public marches, rallies) without you for: Against wearing masks                                                               |
| anti_mask_4_cv                   | Since April 2020, how many demonstrations (public marches, rallies) have you attended in-person for:Against wearing masks                                                                               |

|                        |                                                                                                                                                                                                    |
|------------------------|----------------------------------------------------------------------------------------------------------------------------------------------------------------------------------------------------|
| anti_mask_cv           | Since April 2020, did you watch TV stories, look on the internet, or listen to news on the radio about public demonstrations (public marches, rallies) on: Against wearing masks                   |
| anti_mask_demo_help_cv | When you attended the in-person demonstrations against wearing masks, did you see...Demonstrator helping or protecting a demonstrator                                                              |
| anti_mask_friends_cv   | Who attended a public demonstration without you against wearing masks? Friends:                                                                                                                    |
| anti_mask_neigh_cv     | Who attended a public demonstration without you against wearing masks? Neighbors:                                                                                                                  |
| anti_mask_parents_cv   | Who attended a public demonstration without you against wearing masks?Parents:                                                                                                                     |
| anti_mask_po_force_cv  | When you attended the in-person demonstrations against wearing masks, did you see...Force by police (pushing, shoving or use of tear gas)                                                          |
| anti_mask_po_help_cv   | When you attended the in-person demonstrations against wearing masks, did you see...Police helping or protecting a demonstrator                                                                    |
| anti_mask_sib_cv       | Who attended a public demonstration without you against wearing masks? Siblings:                                                                                                                   |
| anti_mask_violence_cv  | When you attended the in-person demonstrations against wearing masks, did you see. . . Violence by demonstrators (throwing rocks, bottles at police, destroying property)                          |
| assist_sched_cv        | How many days did your parents:Assist you with managing school schedule                                                                                                                            |
| attentive_y_cv         | Please rate how each item describes you now or within the past week: I felt attentive (that is, alert or able to pay attention)                                                                    |
| bedtime_routine_cv     | Over the past week:I kept a bedtime routine (that is, I usually did the same thing each night before bed)...                                                                                       |
| blm_2_cv               | Since April 2020, did you scroll, write, or post to social media (e.g., Facebook, Instagram, Twitter, Snapchat, TikTok) about the demonstrations (public marches, rallies) for: Black Lives Matter |
| blm_3_cv               | Since April 2020, do you know people who attended a public demonstration (public marches, rallies) without you for: Black Lives Matter                                                             |
| blm_4_cv               | Since April 2020, how many demonstrations (public marches, rallies) have you attended in-person for:Black Lives Matter                                                                             |
| blm_cv                 | Since April 2020, did you watch TV stories, look on the internet, or listen to news on the radio about public demonstrations (public marches, rallies) on: Black Lives Matter                      |
| blm_demo_help_cv       | When you attended the in-person demonstrations for Black Lives Matter, did you see...Demonstrator helping or protecting a demonstrator                                                             |
| blm_friends_cv         | Who attended a public demonstration without you for Black Lives Matter? Friends:                                                                                                                   |
| blm_neigh_cv           | Who attended a public demonstration without you for Black Lives Matter? Neighbors:                                                                                                                 |

|                     |                                                                                                                                                                                                                                                                                             |
|---------------------|---------------------------------------------------------------------------------------------------------------------------------------------------------------------------------------------------------------------------------------------------------------------------------------------|
| blm_parents_cv      | Who attended a public demonstration without you for Black Lives Matter? Parents:                                                                                                                                                                                                            |
| blm_po_force_cv     | When you attended the in-person demonstrations for Black Lives Matter, did you see...Force by police (pushing, shoving or use of tear gas)                                                                                                                                                  |
| blm_po_help_cv      | When you attended the in-person demonstrations for Black Lives Matter, did you see...Police helping or protecting a demonstrator                                                                                                                                                            |
| blm_sib_cv          | Who attended a public demonstration without you for Black Lives Matter? Siblings:                                                                                                                                                                                                           |
| blm_social_media_cv | Since April 2020, how often did you scroll, write, or post to social media (e.g., Facebook, Instagram, Twitter, Snapchat, TikTok) about the demonstrations for Black Lives Matter?                                                                                                          |
| blm_time_cv         | Since April 2020, how much time did you spend, on average, watching TV stories, looking on the internet, or listening to news on the radio about demonstrations related to Black Lives Matter?                                                                                              |
| blm_violence_cv     | When you attended the in-person demonstrations for Black Lives Matter, did you see...Violence by demonstrators (throwing rocks, bottles at police, destroying property)                                                                                                                     |
| calm_y_cv           | Please rate how each item describes you now or within the past week. I felt calm                                                                                                                                                                                                            |
| check_hw_cv         | How many days (0 to 7) did your parents: Check homework and assignments with you                                                                                                                                                                                                            |
| concentrate_y_cv    | Please rate how each item describes you now or within the past week. I felt able to concentrate                                                                                                                                                                                             |
| confident_y_cv      | Please rate how each item describes you now or within the past week. I felt confident                                                                                                                                                                                                       |
| coverage_cv         | The following questions ask about your use of different forms of media (television, social media, and other internet sources) to check for news related to the coronavirus pandemic in the past week.How often did you view television media coverage (e.g., news stations) of coronavirus? |
| create_asgn_act_cv  | How many days (0 to 7) did your parents:Create assignments and activities beyond what your school assigned                                                                                                                                                                                  |
| delighted_y_cv      | Please rate how each item describes you now or within the past week. I felt delighted                                                                                                                                                                                                       |
| demo_affect_life_cv | Being afraid of an illness or virus has gotten in the way of enjoying my life (e.g. caused fights in my house, kept me from connecting with others, made me feel isolated or hopeless about the future, etc.).                                                                              |
| demo_afraid_cv      | Being afraid of an illness or virus has caused me to feel very strong emotions in my body (e.g. anger, anxiety, sadness, irritable feelings, etc.).                                                                                                                                         |
| demo_avoid_news     | I avoid news or information about bad illnesses or viruses                                                                                                                                                                                                                                  |
| demo_exercise_cv    | I exercise or play outside                                                                                                                                                                                                                                                                  |
| demo_friends_cv     | How has the frequency of your communication changed during this time with friends?                                                                                                                                                                                                          |

|                                |                                                                                                                                                       |
|--------------------------------|-------------------------------------------------------------------------------------------------------------------------------------------------------|
| demo_hand_sanitizer_cv         | I use Purell/other hand sanitizer                                                                                                                     |
| demo_mask_coverage_cv          | I wear a mask over my face or protective gear (e.g. gloves, things to cover my clothes)                                                               |
| demo_online_cv                 | How has the frequency of your on-line communication changed?                                                                                          |
| demo_parents_cv                | How has the frequency of your communication changed during this time with parents?                                                                    |
| demo_schoolwork_on_computer_cv | I do schoolwork on a computer                                                                                                                         |
| demo_siblings_cv               | How has the frequency of your communication changed during this time with siblings?                                                                   |
| demo_stayed_away_cv            | I stay away from people (other than those who live in my house)                                                                                       |
| demo_stayed_indoors_cv         | I stay away from people inside my house (e.g., stay in another room or a certain distance away)                                                       |
| demo_tone_friends_cv           | How has the tone of your communication changed during this time with friends?                                                                         |
| demo_tone_parents_cv           | How has the tone of your communication changed during this time with parents?                                                                         |
| demo_tone_siblings_cv          | How has the tone of your communication changed during this time with siblings?                                                                        |
| demo_touching_people_cv        | I avoid touching people (e.g., hugging, shaking hands)                                                                                                |
| demo_touching_things_cv        | I avoid touching things (e.g., phone, doorknobs)                                                                                                      |
| demo_wash_hands_cv             | I wash my hands at times other than just after I use the bathroom or before eating                                                                    |
| demo_wipes_cv                  | I use Clorox/cleaners to wipe down surfaces                                                                                                           |
| ease_y_cv                      | Please rate how each item describes you now or within the past week. I felt at ease (Definition: relaxed, comfortable)                                |
| energetic_y_cv                 | Please rate how each item describes you now or within the past week. I felt energetic                                                                 |
| enjoy_school_y_cv              | How much did you enjoy school/school-at-home in the past week:                                                                                        |
| enjoyed_school_wk_y_cv         | How much did you enjoy school?<br>Please rate how each item describes you now or within the past week. I felt enthusiastic (Definition: very excited) |
| enthusiastic_y_cv              |                                                                                                                                                       |
| exp_rac_disc_cv                | Over the past week:I experienced racism or discrimination in relation to coronavirus...                                                               |
| fam_act_cv                     | Over the past week:I participated in family activities...                                                                                             |
| feel_afraid_anti_mask_2_cv     | How did you feel having your sibling(s) attend the against wearing masks demonstration(s) without you? Afraid:                                        |
| feel_afraid_anti_mask_cv       | How did you feel having your parent(s) attend the against wearing masks demonstration(s) without you? Afraid:                                         |



|                             |                                                                                                                          |
|-----------------------------|--------------------------------------------------------------------------------------------------------------------------|
| feel_afraid_blm_2_cv        | How did you feel having your sibling(s) attend the Black Lives Matter demonstration(s) without you?<br>Afraid:           |
| feel_afraid_blm_cv          | How did you feel having your parent(s) attend the Black Lives Matter demonstration(s) without you?<br>Afraid:            |
| feel_afraid_po_2_cv         | How did you feel having your sibling(s) attend the support for police (pro-police) demonstration(s) without you? Afraid: |
| feel_afraid_po_cv           | How did you feel having your parent(s) attend the support for police (pro-police) demonstration(s) without you? Afraid:  |
| feel_afraid_reopen_bus_2_cv | How did you feel having your sibling(s) attend the reopening businesses demonstration(s) without you? Afraid:            |
| feel_afraid_reopen_bus_cv   | How did you feel having your parent(s) attend the reopening businesses demonstration(s) without you? Afraid:             |
| feel_proud_anti_mask_2_cv   | How did you feel having your sibling(s) attend the against wearing masks demonstration(s) without you? Proud:            |
| feel_proud_anti_mask_cv     | How did you feel having your parent(s) attend the against wearing masks demonstration(s) without you? Proud:             |
| feel_proud_blm_2_cv         | How did you feel having your sibling(s) attend the Black Lives Matter demonstration(s) without you? Proud:               |
| feel_proud_blm_cv           | How did you feel having your parent(s) attend the Black Lives Matter demonstration(s) without you? Proud:                |
| feel_proud_po_2_cv          | How did you feel having your sibling(s) attend the support for police (pro-police) demonstration(s) without you? Proud:  |
| feel_proud_po_cv            | How did you feel having your parent(s) attend the support for police (pro-police) demonstration(s) without you? Proud:   |
| feel_proud_reopen_bus_2_cv  | How did you feel having your sibling(s) attend the reopening businesses demonstration(s) without you? Proud:             |
| feel_proud_reopen_bus_cv    | How did you feel having your parent(s) attend the reopening businesses demonstration(s) without you? Proud:              |
| felt_alone_cv               | In the past week. . . : I felt alone                                                                                     |
| felt_always_sad             | In the past week. . . : I could not stop feeling sad                                                                     |
| felt_angry_cv               | In the past week. . . I felt angry or frustrated                                                                         |

|                           |                                                                                                                                                                                                     |
|---------------------------|-----------------------------------------------------------------------------------------------------------------------------------------------------------------------------------------------------|
| felt_cv                   | In the past week. . . : I felt like I couldn't do anything right                                                                                                                                    |
| felt_life_went_wrong_cv   | In the past week. . . : I felt everything in my life went wrong                                                                                                                                     |
| felt_lonely_cv            | In the past week. . . : I felt lonely                                                                                                                                                               |
| felt_nervous_cv           | In the past week. . . : I felt nervous                                                                                                                                                              |
| felt_no_fun_cv            | It was hard for me to have fun                                                                                                                                                                      |
| felt_sad_cv               | In the past week. . . : I felt sad                                                                                                                                                                  |
| felt_scared_cv            | In the past week. . . : I felt scared                                                                                                                                                               |
| felt_unhappy_cv           | In the past week. . . : I felt unhappy                                                                                                                                                              |
| hopeful_against_mask_2_cv | How did you feel when you scrolled, wrote, or posted to social media (e.g., Facebook, Instagram, Twitter, Snapchat, TikTok) about the demonstrations against wearing masks? :Hopeful:               |
| hopeful_anti_mask         | How did you feel having your parent(s) attend the against wearing masks demonstration(s) without you? Hopeful:                                                                                      |
| hopeful_anti_mask_4_cv    | How did you feel when you attended the in-person demonstrations against wearing masks? Hopeful:                                                                                                     |
| hopeful_blm_2_cv          | How did you feel when you scrolled, wrote, or posted to social media (e.g., Facebook, Instagram, Twitter, Snapchat, TikTok) about the demonstrations for Black Lives Matter? Hopeful                |
| hopeful_blm_4_cv          | How did you feel when you attended the in-person demonstrations for Black Lives Matter? Hopeful:                                                                                                    |
| hopeful_blm_cv            | How did you feel when you saw or heard about the demonstrations on the TV, internet, or radio for Black Lives Matter? Hopeful:                                                                      |
| hopeful_pro_po_2_cv       | How did you feel when you scrolled, wrote, or posted to social media (e.g., Facebook, Instagram, Twitter, Snapchat, TikTok) about the demonstrations for support for police (pro-police)? Hopeful:  |
| hopeful_pro_po_4_cv       | How did you feel when you saw or heard about the demonstrations on the TV, internet, or radio for support for police (pro-police)? Hopeful:                                                         |
| hopeful_pro_po_cv         | How did you feel when you scrolled, wrote, or posted to social media (e.g., Facebook, Instagram, Twitter, Snapchat, TikTok) about the demonstrations for reopening of businesses? Hopeful:          |
| hopeful_reopen_bus_2_cv   | How did you feel when you scrolled, wrote, or posted to social media (e.g., Facebook, Instagram, Twitter, Snapchat, TikTok) about the demonstrations for reopening of businesses? Hopeful: (round4) |
| hopeful_reopen_bus_4_cv   | How did you feel when you attended the in-person demonstrations for reopening of businesses? Hopeful:                                                                                               |
| hopeful_reopen_bus_cv     | How did you feel when you saw or heard about the demonstrations on the TV, internet, or radio for reopening of businesses? Hopeful:                                                                 |

|                            |                                                                                                                                                                                                     |
|----------------------------|-----------------------------------------------------------------------------------------------------------------------------------------------------------------------------------------------------|
| hopeful_y_cv               | How hopeful are you that the coronavirus/COVID-19 crisis in your area will end soon?                                                                                                                |
| hours_language_cv          | In the past week on an average weekday, how many hours per day did you spend doing school or school-like activities, including online or in-person school?Language Arts                             |
| hours_math_cv              | In the past week on an average weekday, how many hours per day did you spend doing school or school-like activities, including online or in-person school?Math                                      |
| hours_other_cv             | In the past week on an average weekday, how many hours per day did you spend doing school or school-like activities, including online or in-person school?Other                                     |
| hours_reading_cv           | In the past week on an average weekday, how many hours per day did you spend doing school or school-like activities, including online or in-person school?Reading                                   |
| hours_science_cv           | In the past week on an average weekday, how many hours per day did you spend doing school or school-like activities, including online or in-person school?Science                                   |
| hours_social_cv            | In the past week on an average weekday, how many hours per day did you spend doing school or school-like activities, including online or in-person school?Social Studies                            |
| inspired_against_mask_2_cv | How did you feel when you scrolled, wrote, or posted to social media (e.g., Facebook, Instagram, Twitter, Snapchat, TikTok) about the demonstrations against wearing masks? : Inspired:             |
| inspired_anti_mask         | How did you feel having your parent(s) attend the against wearing masks demonstration(s) without you? Inspired:                                                                                     |
| inspired_anti_mask_4_cv    | How did you feel when you attended the in-person demonstrations against wearing masks? Inspired:                                                                                                    |
| inspired_blm_2_cv          | How did you feel when you scrolled, wrote, or posted to social media (e.g., Facebook, Instagram, Twitter, Snapchat, TikTok) about the demonstrations for Black Lives Matter? Inspired               |
| inspired_blm_4_cv          | How did you feel when you attended the in-person demonstrations for Black Lives Matter? Inspired:                                                                                                   |
| inspired_blm_cv            | How did you feel when you saw or heard about the demonstrations on the TV, internet, or radio for Black Lives Matter? Inspired:                                                                     |
| inspired_pro_po_2_cv       | How did you feel when you scrolled, wrote, or posted to social media (e.g., Facebook, Instagram, Twitter, Snapchat, TikTok) about the demonstrations for support for police (pro-police)? Inspired: |
| inspired_pro_po_4_cv       | How did you feel when you attended the in-person demonstrations for pro-police? Inspired:                                                                                                           |
| inspired_pro_po_cv         | How did you feel when you saw or heard about the demonstrations on the TV, internet, or radio for support for police (pro-police)? Inspired:                                                        |
| inspired_reopen_bus_2_cv   | How did you feel when you scrolled, wrote, or posted to social media (e.g., Facebook, Instagram, Twitter, Snapchat, TikTok) about the demonstrations for reopening of businesses? Inspired:         |

|                          |                                                                                                                                      |
|--------------------------|--------------------------------------------------------------------------------------------------------------------------------------|
| inspired_reopen_bus_4_cv | How did you feel when you attended the in-person demonstrations for reopening of businesses?<br>Inspired:                            |
| inspired_reopen_bus_cv   | How did you feel when you saw or heard about the demonstrations on the TV, internet, or radio for reopening of businesses? Inspired: |
| interested_y_cv          | Please rate how each item describes you now or within the past week. I felt interested                                               |
| life_change_y_cv         | How much do you think your life has changed due to coronavirus (COVID-19)?                                                           |
| mctq_fd_awakening_min_cv | Report on your typical sleep behavior over the past week. : Altogether, these awakenings last _____minutes.                          |
| mctq_fd_btime_cv         | Report on your typical sleep behavior over the past week. : I go to bed at:                                                          |
| mctq_fd_min_to_get_up_cv | Report on your typical sleep behavior over the past week. : After _____minutes I get up.                                             |
| mctq_fd_min_to_sleep_cv  | Report on your typical sleep behavior over the past week. : I need_____minutes to fall asleep.                                       |
| mctq_fd_num_wake_up_cv   | Report on your typical sleep behavior over the past week. : After falling asleep, I wake up____times during the night.               |
| mctq_fd_time_asleep_cv   | Report on your typical sleep behavior over the past week. : I actually start trying to fall asleep at:                               |
| mctq_fd_wake_up_time_cv  | Report on your typical sleep behavior over the past week. : I wake up at:                                                            |
| mctq_schedule_time_cv    | Report on your typical sleep behavior over the past week. : I start my school work at:                                               |
| mental_health_cv         | How do you think your mental health (emotional well-being) is in the past week compared to normal?                                   |
| missing_school_cv        | How worried are you about missing school in-person?                                                                                  |
| mod_phys_act_hour_2_cv   | How much time did you usually spend doing moderate or vigorous physical activities on one of those days? for round 3 and 4           |
| mod_phys_act_hour_cv     | How much time did you usually spend doing moderate or vigorous physical activities on one of those days?                             |
| mod_phys_act_min_cv      | How much time did you usually spend doing moderate or vigorous physical activities on one of those days? Minutes                     |
| money_cv                 | Over the past week:I worried that my family would not have enough money to pay for necessities like clothing or bills...             |
| news_update_cv           | How often did you check for coronavirus news and updates using the internet (e.g. YouTube)? Do not include checking social media.    |

|                           |                                                                                                                                                                                                                                |
|---------------------------|--------------------------------------------------------------------------------------------------------------------------------------------------------------------------------------------------------------------------------|
| online_arts_cv            | In the past week on an average weekday, how many hours per day did you spend doing school or school-like activities, including online or in-person school? : Reading/Language Arts/Social Studies:                             |
| online_other_cv           | In the past week on an average weekday, how many hours per day did you spend doing school or school-like activities, including online or in-person school?: Other:                                                             |
| online_science_cv         | In the past week on an average weekday, how many hours per day did you spend doing school or school-like activities, including online or in-person school?: Math/Science:                                                      |
| others_worry_y_cv         | How worried have others around you been about coronavirus (COVID-19)?                                                                                                                                                          |
| outdoor_act_cv            | Over the past week: I did outdoor activities...                                                                                                                                                                                |
| parent_involve_school_cv  | In the past week, about how many days per week was a parent (or other adult taking care of you) involved with your schoolwork?                                                                                                 |
| parent_involved_school_cv | In the past week, about how many days per week was a parent (or other adult taking care of you) involved with your school work?                                                                                                |
| parent_monitor_q1_y_cv    | About your life over the past week: How often do your parents/guardians know where you are?                                                                                                                                    |
| parent_monitor_q3_y_cv    | About your life over the past week:If you are at home when your parents or guardians are not, how often do you know how to get in touch with them?                                                                             |
| parent_monitor_q4_y_cv    | About your life over the past week:How often do you talk to your mom/dad or guardian about your plans for the coming day, such as your plans about what will happen at school (or school-at-home) or what you are going to do? |
| parent_monitor_q5_y_cv    | About your life over the past week:How many times do you and your parents/guardians eat dinner together?                                                                                                                       |
| past_week_cope_cv__1      | And finally, in the past week, to cope, have you done any of the following? : 1, Took breaks from watching, reading, or listening to news stories, including social media                                                      |
| past_week_cope_cv__2      | And finally, in the past week, to cope, have you done any of the following? : 2, Participated in a neighborhood social distance activity (such decorated windows or driveway, singing from balcony or porch)                   |
| past_week_cope_cv__3      | And finally, in the past week, to cope, have you done any of the following? : 3, Took care of your body, such as taking deep breaths, stretching, or meditating                                                                |
| past_week_cope_cv__4      | And finally, in the past week, to cope, have you done any of the following? : 4, Exercised (such as walking, running, or an online exercise class)                                                                             |
| past_week_cope_cv__5      | And finally, in the past week, to cope, have you done any of the following? : 5, Spent more time on hobbies, or started a new one                                                                                              |

|                           |                                                                                                                                                                                                                                                                                       |
|---------------------------|---------------------------------------------------------------------------------------------------------------------------------------------------------------------------------------------------------------------------------------------------------------------------------------|
| past_week_cope_cv__6      | And finally, in the past week, to cope, have you done any of the following? : 6, Engaged in healthy behaviors, like trying to eat healthy, getting plenty of sleep                                                                                                                    |
| past_week_cope_cv__7      | And finally, in the past week, to cope, have you done any of the following? : 7, Made time to relax                                                                                                                                                                                   |
| past_week_cope_cv__8      | And finally, in the past week, to cope, have you done any of the following? : 8, Connected with others online or by phone                                                                                                                                                             |
| past_week_cope_cv__9      | And finally, in the past week, to cope, have you done any of the following? : 9, None of the above                                                                                                                                                                                    |
| pet_identify_cv__1        | Please select all the pets that you currently have: 1, Dog                                                                                                                                                                                                                            |
| pet_identify_cv__2        | Please select all the pets that you currently have: 2, Cat                                                                                                                                                                                                                            |
| pet_identify_cv__3        | Please select all the pets that you currently have: 3, Horse                                                                                                                                                                                                                          |
| pet_identify_cv__4        | Please select all the pets that you currently have: 4, Fish                                                                                                                                                                                                                           |
| pet_identify_cv__5        | Please select all the pets that you currently have: 5, Small animal (e.g., rabbit, hamster, bird)                                                                                                                                                                                     |
| pet_identify_cv__6        | Please select all the pets that you currently have: 6, Other                                                                                                                                                                                                                          |
| pets_cv                   | Do you currently have any pets?                                                                                                                                                                                                                                                       |
| physical_activities_hr_cv | During the past week, on how many days did you do moderate or vigorous physical activities like heavy lifting, running, aerobics, or bicycling? (Moderate physical activities refer to activities that take moderate to hard physical effort and make you breathe harder than normal) |
| ple_close_fam_cv          | Are you separated from a close family member (like can't be together with a parent, or can't visit a close family member)?                                                                                                                                                            |
| ple_close_fam_fu_y_cv     | Separated from close family member: Was this a mostly good or bad experience?                                                                                                                                                                                                         |
| ple_close_fam_fu2_cv      | Separated from close family member: How much has this affected you?                                                                                                                                                                                                                   |
| ple_close_fam_fu3_y_cv    | Separated from close family member: Is this due to the coronavirus situation?                                                                                                                                                                                                         |
| pro_po_2_cv               | Since April 2020, did you scroll, write, or post to social media (e.g., Facebook, Instagram, Twitter, Snapchat, TikTok) about the demonstrations (public marches, rallies) for: Support for police (pro-police)                                                                       |
| pro_po_3_cv               | Since April 2020, do you know people who attended a public demonstration (public marches, rallies) without you for: Support for police (pro-police)                                                                                                                                   |
| pro_po_4_cv               | Since April 2020, how many demonstrations (public marches, rallies) have you attended in-person for: Support for police (pro-police)                                                                                                                                                  |

|                            |                                                                                                                                                                                                                                                |
|----------------------------|------------------------------------------------------------------------------------------------------------------------------------------------------------------------------------------------------------------------------------------------|
| pro_po_cv                  | Since April 2020, did you watch TV stories, look on the internet, or listen to news on the radio about public demonstrations (public marches, rallies) on: Support for police (pro-police)                                                     |
| pro_po_demo_help_cv        | When you attended the in-person demonstrations for support for police (pro-police), did you see. . . Demonstrator helping or protecting a demonstrator                                                                                         |
| pro_po_force_cv            | When you attended the in-person demonstrations for support for police (pro-police), did you see. . . Force by police (pushing, shoving or use of tear gas)                                                                                     |
| pro_po_friends_cv          | Who attended a public demonstration without you for support for police (pro-police)? Friends: When you attended the in-person demonstrations for support for police (pro-police), did you see. . . Police helping or protecting a demonstrator |
| pro_po_help_cv             | Who attended a public demonstration without you for support for police (pro-police)? Neighbors:                                                                                                                                                |
| pro_po_neigh_cv            | Who attended a public demonstration without you for support for police (pro-police)? Parents:                                                                                                                                                  |
| pro_po_parents_cv          | Who attended a public demonstration without you for support for police (pro-police)? Siblings:                                                                                                                                                 |
| pro_po_sib_cv              | Since April 2020, how often did you scroll, write, or post to social media (e.g., Facebook, Instagram, Twitter, Snapchat, TikTok) about the demonstrations for support for police (pro-police)?                                                |
| pro_po_social_media_cv     | Since April 2020, how much time did you spend, on average, watching TV stories, looking on the internet, or listening to news on the radio about demonstrations related to support for police (pro-police)?                                    |
| pro_po_time_cv             | When you attended the in-person demonstrations for support for police (pro-police), did you see. . . Violence by demonstrators (throwing rocks, bottles at police, destroying property)                                                        |
| pro_po_violence_cv         | In the last month, how often have you felt confident about your ability to handle your personal problems?                                                                                                                                      |
| pstr_confidence_p_cv       | In the last month, how often have you felt difficulties were piling up so high that you could not overcome them?                                                                                                                               |
| pstr_overcome_p_cv         | In the last month, how often have you felt that you were unable to control the important things in your life?                                                                                                                                  |
| pstr_unable_control_cv     | In the last month, how often have you felt that things were going your way?                                                                                                                                                                    |
| pstr_way_p_cv              | How much privacy did you have while you were completing this questionnaire today?                                                                                                                                                              |
| questionnaire_privacy_cv   | Over the past week: I had regular meals...                                                                                                                                                                                                     |
| reg_meals_cv               | In the last week, the relationships between members of your family are:                                                                                                                                                                        |
| relationships_w_family_cv  | In the last week, your friendships are:                                                                                                                                                                                                        |
| relationships_w_friends_cv |                                                                                                                                                                                                                                                |

|                                           |                                                                                                                                                                                                      |
|-------------------------------------------|------------------------------------------------------------------------------------------------------------------------------------------------------------------------------------------------------|
| reopen_bus_2_cv                           | Since April 2020, did you scroll, write, or post to social media (e.g., Facebook, Instagram, Twitter, Snapchat, TikTok) about the demonstrations (public marches, rallies) for: Reopening businesses |
| reopen_bus_3_cv                           | Since April 2020, do you know people who attended a public demonstration (public marches, rallies) without you for: Reopening businesses                                                             |
| reopen_bus_4_cv                           | Since April 2020, how many demonstrations (public marches, rallies) have you attended in-person for: Reopening businesses                                                                            |
| reopen_bus_cv                             | Since April 2020, did you watch TV stories, look on the internet, or listen to news on the radio about public demonstrations (public marches, rallies) on Reopening businesses                       |
| reopen_bus_demo_help_cv                   | When you attended the in-person demonstrations for reopening of businesses, did you see...Demonstrator helping or protecting a demonstrator                                                          |
| reopen_bus_friends_cv                     | Who attended a public demonstration without you for reopening businesses?Friends:                                                                                                                    |
| reopen_bus_neigh_cv                       | Who attended a public demonstration without you for reopening businesses?Neighbors:                                                                                                                  |
| reopen_bus_parents_cv                     | Who attended a public demonstration without you for reopening businesses?Parents:                                                                                                                    |
| reopen_bus_po_force_cv                    | When you attended the in-person demonstrations for reopening of businesses, did you see...Force by police (pushing, shoving or use of tear gas)                                                      |
| reopen_bus_po_help_cv                     | When you attended the in-person demonstrations for reopening of businesses, did you see...Police helping or protecting a demonstrator                                                                |
| reopen_bus_sib_cv                         | Who attended a public demonstration without you for reopening businesses?Siblings:                                                                                                                   |
| reopen_bus_social_media_cv                | Since April 2020, how often did you scroll, write, or post to social media (e.g., Facebook, Instagram, Twitter, Snapchat, TikTok) about the demonstrations for reopening businesses?                 |
| reopen_bus_time_cv                        | Since April 2020, how much time did you spend, on average, watching TV stories, looking on the internet, or listening to news on the radio about demonstrations related to reopening businesses?     |
| reopen_bus_violence_cv                    | When you attended the in-person demonstrations for reopening of businesses, did you see...Violence by demonstrators (throwing rocks, bottles at police, destroying property)                         |
| reopen_bus_routine_cv                     | Over the past week: I kept a morning routine (that is, I usually did the same thing each morning)...                                                                                                 |
| reopen_bus_scared_easily_cv               | In the past week...I got scared really easily                                                                                                                                                        |
| reopen_bus_school_cv                      | In the past week, is your schooling like it was in January 2020?                                                                                                                                     |
| reopen_bus_school_like_activities_cv      | Of this time, how many hours per day did you spend in on-line classes, or other school-related on-line gatherings with other students or teachers?                                                   |
| reopen_bus_schoollikeactivitiesreduced_cv | How many hours per day did you spend in on-line classes, or other school-related on-line gatherings with other students or teachers?                                                                 |



|                               |                                                                                                                                                                                                                       |
|-------------------------------|-----------------------------------------------------------------------------------------------------------------------------------------------------------------------------------------------------------------------|
| school_work_cv                | Did you find that your school work was:                                                                                                                                                                               |
| schooling_cv                  | In the past week, was your schooling taking place:                                                                                                                                                                    |
| screentime_10_wknd_hr_cv      | Play multiplayer video games on a computer, console, phone, or other device (Xbox, PlayStation, iPad, AppleTV) where you can interact with others in the game?                                                        |
| screentime_11_wknd_hr_cv      | Text on a cell phone, tablet, computer, iPod, or other electronic device (e.g., GChat, Whatsapp, Kik etc.)?                                                                                                           |
| screentime_12_wknd_hr_cv      | Visit social media apps (e.g., Snapchat, Facebook, Twitter, Instagram, TikTok, etc.?) (Do not include time spent editing photos or videos to post on social media.)                                                   |
| screentime_14_wknd_hr_cv      | Video chat (Skype, FaceTime, VRchat, etc.) that is NOT for school                                                                                                                                                     |
| screentime_15_wknd_hr_cv      | Searching or browsing the internet (e.g., using Google) that is NOT for school                                                                                                                                        |
| screentime_7_wknd_hr_cv       | Watch "or stream" movies, videos or TV shows? (such as Hulu, Netflix, Amazon, YouTube, Twitch)                                                                                                                        |
| screentime_9_wknd_hr_cv       | Play single-player video games on a computer, console, phone or other device (Xbox, PlayStation, iPad, AppleTV)?                                                                                                      |
| screentime_cv                 | On a typical day in the past week, how much TIME per day did you spend playing an instrument or singing?                                                                                                              |
| screentime_music_cv           | On a typical day in the past week, how much TIME per day did you spend listening to music/watching music videos?                                                                                                      |
| screentime_wknd_hr_cv         | On a typical day, how much TIME per day do you spend in TOTAL on a computer, phone, tablet, iPod, or other device or video game? (Do NOT include time spent on school work)                                           |
| screentime_wknd_typical_hr_cv | On a typical day, how much TIME per day do you spend in TOTAL connecting with friends digitally (all forms listed above included)?                                                                                    |
| sitting_weekday_hour_2_cv     | During the past week, how much time did you usually spend sitting on a day? (This may include time spent sitting at a desk, reading, or sitting or lying down to watch television or play video-games) (round1 and 2) |
| sitting_weekday_hour_cv       | During the past week, how much time did you usually spend sitting on a day? (This may include time spent sitting at a desk, reading, or sitting or lying down to watch television or play video-games)                |
| social_media_cv               | The following questions ask about your use of different forms of media (television, social media, and other internet sources) to check for news related to the coronavirus pandemic in the past week.How              |

often did you look at coronavirus-related social media activity (e.g. Facebook, Twitter, Instagram, TikTok, SnapChat)?

The following questions ask about your use of different forms of media (television, social media, and other internet sources) to check for news related to the coronavirus pandemic in the past week. Which platform did you use the most when checking for news related to coronavirus?

social\_media\_platform\_cv  
something\_awful\_cv

In the past week...I felt like something awful might happen

stressful\_y\_cv

COVID-19 presents a lot of uncertainty about the future. In the past 7 days, including today, how stressful have you found this uncertainty to be?

strle\_angry\_cv

Below is a list of comments made by people after a stressful life event. Thinking about the coronavirus situation, please check each item showing how often these comments were true for you in the past week. If they did not occur this week, check "not at all". I felt angry or frustrated

strle\_not\_talk\_about\_cv

Below is a list of comments made by people after a stressful life event. Thinking about the coronavirus situation, please check each item showing how often these comments were true for you in the past week. If they did not occur this week, check "not at all". Do you try not to talk about it?

strle\_pictures\_cv

Below is a list of comments made by people after a stressful life event. Thinking about the coronavirus situation, please check each item showing how often these comments were true for you in the past week. If they did not occur this week, check "not at all". Do pictures about it pop into your mind?

strle\_reminder\_pl\_cv

Below is a list of comments made by people after a stressful life event. Thinking about the coronavirus situation, please check each item showing how often these comments were true for you in the past week. If they did not occur this week, check "not at all". Do you stay away from reminders of it (e.g. places or situations?)

strle\_rv\_fr\_mem\_cv

Below is a list of comments made by people after a stressful life event. Thinking about the coronavirus situation, please check each item showing how often these comments were true for you in the past week. If they did not occur this week, check "not at all". Do you try to remove it from your memory?

strle\_strong\_feelings\_cv

Below is a list of comments made by people after a stressful life event. Thinking about the coronavirus situation, please check each item showing how often these comments were true for you in the past week. If they did not occur this week, check "not at all". Do you have waves of strong feelings about it?

|                           |                                                                                                                                                                                                                                                                                                                       |
|---------------------------|-----------------------------------------------------------------------------------------------------------------------------------------------------------------------------------------------------------------------------------------------------------------------------------------------------------------------|
| strle_think_about_cv      | Below is a list of comments made by people after a stressful life event. Thinking about the coronavirus situation, please check each item showing how often these comments were true for you in the past week. If they did not occur this week, check "not at all".Do other things keep making you think about it?    |
| strle_think_of_cv         | Below is a list of comments made by people after a stressful life event. Thinking about the coronavirus situation, please check each item showing how often these comments were true for you in the past week. If they did not occur this week, check "not at all".Do you think about it even when you don't mean to? |
| strle_try_not_to_think_cv | Below is a list of comments made by people after a stressful life event. Thinking about the coronavirus situation, please check each item showing how often these comments were true for you in the past week. If they did not occur this week, check "not at all".Do you try not to think about it?                  |
| su_alcohol_cv             | On how many DAYS (if any) during the LAST 30 DAYS have you...Had a drink containing alcohol?                                                                                                                                                                                                                          |
| su_liquids_cv             | On how many DAYS (if any) during the LAST 30 DAYS have you...Sniffed liquids, sprays or gases to get high?                                                                                                                                                                                                            |
| su_medication_cv          | On how many DAYS (if any) during the LAST 30 DAYS have you...Used any prescription medications in a way your doctor did not direct you to use them?                                                                                                                                                                   |
| su_meth_cv                | On how many DAYS (if any) during the LAST 30 DAYS have you...Used any other drugs such as cocaine, methamphetamine, heroin, or hallucinogens?                                                                                                                                                                         |
| su_mj_edible_cv           | On how many DAYS (if any) during the LAST 30 DAYS have you...Had marijuana that you eat, such as pot cookies, gummy bears or brownies that contain marijuana?                                                                                                                                                         |
| su_mj_oils_cv             | On how many DAYS (if any) during the LAST 30 DAYS have you. . . Smoked marijuana oils or concentrates, such as THC oil, hash oil or dabs" in a pipe or dab rig?"                                                                                                                                                      |
| su_mj_use_past_month_cv   | Have you used marijuana in the past month?                                                                                                                                                                                                                                                                            |
| su_smoked_mj_fl_cv        | On how many DAYS (if any) during the LAST 30 DAYS have you...Smoked marijuana flower or bud in a pipe, joint or hookah or bong?                                                                                                                                                                                       |
| su_smoked_tob_cig_cv      | On how many DAYS (if any) during the LAST 30 DAYS have you...Smoked a tobacco cigar, hookah or pipe?                                                                                                                                                                                                                  |
| su_tobacco_chew_cv        | On how many DAYS (if any) during the LAST 30 DAYS have you...Used smokeless tobacco, chew, or snus?                                                                                                                                                                                                                   |
| su_tobacco_cig_cv         | On how many DAYS (if any) during the LAST 30 DAYS have you...Smoked a tobacco cigarette?                                                                                                                                                                                                                              |

|                           |                                                                                                                                                                                    |
|---------------------------|------------------------------------------------------------------------------------------------------------------------------------------------------------------------------------|
| su_vape_nic_cv            | On how many DAYS (if any) during the LAST 30 DAYS have you...Vaped using an electronic nicotine or vaping product, such as e-cigarettes, vape pen, or JUUL?                        |
| su_vaped_mj_fl_cv         | On how many DAYS (if any) during the LAST 30 DAYS have you...Vaped marijuana flower or bud in a vape pen, vaporizer, or e-vaporizer?                                               |
| su_vaped_mj_oils_cv       | On how many DAYS (if any) during the LAST 30 DAYS have you...Vaped marijuana oils or concentrates such as THC, hash or BHO oil, in a vape pen or vaporizer?                        |
| teach_concept_cv          | How many days (0 to 7) did your parents:Directly teach you concepts                                                                                                                |
| tv_view_cv                | How many days (0 to 7) did your parents:Which television channel did you watch most when viewing news related to coronavirus? (include both watching on a TV and streaming online) |
| walk_10_min_per_day_cv    | During the past week, on how many days did you walk for at least 10 minutes at a time?                                                                                             |
| walking_hour_per_day_2_cv | How much time did you usually spend on one of those days walking for at least 10 minutes at a time? hours                                                                          |
| walking_hour_per_day_cv   | How much time did you usually spend on one of those days walking for at least 10 minutes at a time? hours ( round1 and 2)                                                          |
| walking_min_per_day_cv    | How much time did you usually spend on one of those days walking for at least 10 minutes at a time? Minutes                                                                        |
| witness_rac_disc_cv       | Over the past week: I witnessed racism or discrimination in relation to coronavirus . . .                                                                                          |
| worried_about_me_cv       | In the past week...I worried about what could happen to me                                                                                                                         |
| worried_at_home_cv        | In the past week...I worried when I was at home                                                                                                                                    |
| worried_at_night_cv       | In the past week...I worried when I went to bed at night                                                                                                                           |
| worried_cv                | In the past week...I felt worried                                                                                                                                                  |
| worry_y_cv                | In the past week...How worried have you been about coronavirus (COVID-19)?                                                                                                         |
| collection_title          | collection_title                                                                                                                                                                   |
| study_cohort_name         | study_cohort_name                                                                                                                                                                  |

**eTable 3** – ABCD Parent COVID-19 Assessments

|                          |                                                                                                                                                                                |
|--------------------------|--------------------------------------------------------------------------------------------------------------------------------------------------------------------------------|
| subjectkey               | The NDAR Global Unique Identifier (GUID) for research subject                                                                                                                  |
| src_subject_id           | Subject ID how it's defined in lab/project                                                                                                                                     |
| interview_date           | Date on which the interview/genetic test/sampling/imaging/biospecimen was completed.<br>MM/DD/YYYY                                                                             |
| interview_age            | Age in months at the time of the interview/test/sampling/imaging.                                                                                                              |
| sex                      | Sex of the subject                                                                                                                                                             |
| eventname                | The event name for which the data was collected                                                                                                                                |
| cv_p_select_language___1 | Espanol? (asking if the assessment should be given in Spanish)                                                                                                                 |
| ext_fam_diag_cv          | Number of extended family member(s) and/or close friends diagnosed with coronavirus:                                                                                           |
| ext_fam_severity_cv      | Rate the symptoms of the person who was most sick:                                                                                                                             |
| fam_actions_cv___1       | In the past week our family has (check all that apply; by your choice rather than because it's closed): 1 Engaged in social distancing                                         |
| fam_actions_cv___2       | In the past week our family has (check all that apply; by your choice rather than because it's closed): 2 Avoided gatherings of 250 people or more                             |
| fam_actions_cv___3       | In the past week our family has (check all that apply; by your choice rather than because it's closed): 3 Avoided gatherings of 10 people or more                              |
| fam_actions_cv___4       | In the past week our family has (check all that apply; by your choice rather than because it's closed): 4 Avoided visiting family and friends outside our own immediate family |
| fam_actions_cv___5       | In the past week our family has (check all that apply; by your choice rather than because it's closed): 5 Avoided having people in our home except for a immediate family      |
| fam_actions_cv___6       | In the past week our family has (check all that apply; by your choice rather than because it's closed): 6 Avoided restaurant dining                                            |
| fam_actions_cv___7       | In the past week our family has (check all that apply; by your choice rather than because it's closed): 7 Avoided restaurant take-out                                          |
| fam_actions_cv___8       | In the past week our family has (check all that apply; by your choice rather than because it's closed): 8 Avoided grocery store or pharmacies                                  |
| fam_actions_cv___9       | In the past week our family has (check all that apply; by your choice rather than because it's closed): 9 Avoided stores (not including grocery stores or a pharmacies)        |

|                     |                                                                                                                                                                                                           |
|---------------------|-----------------------------------------------------------------------------------------------------------------------------------------------------------------------------------------------------------|
| fam_actions_cv___10 | In the past week our family has (check all that apply; by your choice rather than because it's closed): 10 Avoided routine doctor visits                                                                  |
| fam_actions_cv___11 | In the past week our family has (check all that apply; by your choice rather than because it's closed): 11 Avoided places like gyms malls movie theatres                                                  |
| fam_actions_cv___12 | In the past week our family has (check all that apply; by your choice rather than because it's closed): 12 Avoided taking public transportation                                                           |
| fam_actions_cv___13 | In the past week our family has (check all that apply; by your choice rather than because it's closed): 13 Avoided parks or playgrounds                                                                   |
| fam_actions_cv___14 | In the past week our family has (check all that apply; by your choice rather than because it's closed): 15 Wore a mask                                                                                    |
| fam_actions_cv___15 | In the past week our family has (check all that apply; by your choice rather than because it's closed): 4 None of the above                                                                               |
| fam_discord_cv      | Please rate how much the coronavirus pandemic has changed your family's life in each of the following ways. Stress and discord in the family:                                                             |
| fam_exp_racism_cv   | I am worried that our family will experience racism or discrimination in relation to coronavirus                                                                                                          |
| fam_exp1_cv         | Were you ever worried about whether your food would run out before you could get more?                                                                                                                    |
| fam_exp2_cv         | Needed food but couldn't afford to buy it or couldn't afford to get out to get it?                                                                                                                        |
| fam_exp3_cv         | Were without telephone service because you could not afford it?                                                                                                                                           |
| fam_exp4_cv         | Didn't pay the full amount of the rent or mortgage because you could not afford it?                                                                                                                       |
| fam_exp5_cv         | Were evicted from your home for not paying the rent or mortgage?                                                                                                                                          |
| fam_exp6_cv         | Had services turned off by the gas or electric company or the oil company wouldn't deliver oil because payments were not made?                                                                            |
| fam_exp7_v2_cv      | If you lost all your current source(s) of household income (your paycheck public assistance or other forms of income) how long could you continue to live at your current address and standard of living? |
| fam_expose_cv       | Was anyone in your household at increased risk for COVID-19 due to work in healthcare or other essential jobs (such as grocery store factory gig economy) or use of public transit?                       |
| fam_hc_acc_cv       | Please rate how much the coronavirus pandemic has changed your family's life in each of the following ways. Medical health care access:                                                                   |
| fam_ht_acc_cv       | Please rate how much the coronavirus pandemic has changed your family's life in each of the following ways. Mental health treatment access:                                                               |

|                        |                                                                                                                                                                                                                                                                                                                                                             |
|------------------------|-------------------------------------------------------------------------------------------------------------------------------------------------------------------------------------------------------------------------------------------------------------------------------------------------------------------------------------------------------------|
| fam_rout_cv            | Please rate how much the coronavirus pandemic has changed your family's life in each of the following ways. Routines Rutinas:                                                                                                                                                                                                                               |
| fam_self_quarantine_cv | Did this person need to self-quarantine in a separate section of the household?                                                                                                                                                                                                                                                                             |
| fam_size_cv            | How many people are living at your address? INCLUDE yourself and everyone who is living or staying at your place this week.                                                                                                                                                                                                                                 |
| fam_stress_cv          | Please rate how much the coronavirus pandemic has changed your family's life in each of the following ways. Experience of stress related to coronavirus pandemic                                                                                                                                                                                            |
| fam_supp_acc_cv        | Please rate how much the coronavirus pandemic has changed your family's life in each of the following ways. Access to family and close non-family social contacts (such as friends neighbors members of a social or religious group you belong to)                                                                                                          |
| fam_wage_loss_cv       | Since January 2020 has anyone in your household lost wages sales or work due to the impact of coronavirus on employment business or the economy?                                                                                                                                                                                                            |
| future_scan_1_cv       | Once local restrictions are lifted how likely are you to return to your ABCD on-site location with your child(ren) for collection of height and weight measurement blood pressure and biosamples like saliva and blood given that the necessary precautions outlined by the CDC are in place (personal protective equipment; social distancing guidelines)? |
| future_scan_cv         | Once local restrictions are lifted how likely are you to return to your ABCD on-site location with your child(ren) for an MRI scan given that necessary precautions outlined by the CDC are in place (personal protective equipment; social distancing guidelines)?                                                                                         |
| get_coronavirus_cv     | I think it is likely that I will get coronavirus                                                                                                                                                                                                                                                                                                            |
| increased_conflict_cv  | I have noticed increased conflict in our family since our area started worrying about coronavirus                                                                                                                                                                                                                                                           |
| p_cope_cv__1           | In the past week to cope have you done any of the following? (check all that apply) : 1 Took breaks from watching reading or listening to news stories including social media                                                                                                                                                                               |
| p_cope_cv__2           | In the past week to cope have you done any of the following? (check all that apply) : 2 Participated in a neighborhood social distance activity (such as decorated windows or driveway singing from balcony or porch)                                                                                                                                       |
| p_cope_cv__3           | In the past week to cope have you done any of the following? (check all that apply) : 3 Took care of my body such as taking deep breaths stretching or meditating                                                                                                                                                                                           |
| p_cope_cv__4           | In the past week to cope have you done any of the following? (check all that apply) : 4 Exercised (such as walking running or an online exercise class)                                                                                                                                                                                                     |

p\_cope\_cv\_\_\_5 In the past week to cope have you done any of the following? (check all that apply) : 5 Spent more time on hobbies or started a new one

p\_cope\_cv\_\_\_6 In the past week to cope have you done any of the following? (check all that apply) : 6 Engaged in healthy behaviors like trying to eat healthy getting plenty of sleep

p\_cope\_cv\_\_\_7 In the past week to cope have you done any of the following? (check all that apply) : 7 Made time to relax

p\_cope\_cv\_\_\_8 In the past week to cope have you done any of the following? (check all that apply) : 8 Connected with others online or by phone

p\_cope\_cv\_\_\_9 In the past week to cope have you done any of the following? (check all that apply) : 9 None of the above

p\_enjoy\_cv Are you able to enjoy things?

p\_life\_changed\_cv How much do you think your life has changed due to the coronavirus (COVID-19)

p\_worry\_cv How worried have you been about coronavirus (COVID-19)?

su\_p\_alc\_drinks\_used\_cv How many alcoholic drinks did you have on a typical day when you drank alcohol?

su\_p\_alc\_use\_cv On how many days did you use alcohol?

su\_p\_cig\_loc\_cv\_\_\_1 Where did you use cigarettes? (check all that apply) : 1 In the house

su\_p\_cig\_loc\_cv\_\_\_2 Where did you use cigarettes? (check all that apply) : 2 Balcony / deck

su\_p\_cig\_loc\_cv\_\_\_3 Where did you use cigarettes? (check all that apply) : 3 In the car

su\_p\_cig\_loc\_cv\_\_\_4 Where did you use cigarettes? (check all that apply) : 4 Outside

su\_p\_cig\_loc\_cv\_\_\_5 Where did you use cigarettes? (check all that apply) : 5 Other

su\_p\_cig\_use\_cv About how many times per day did you use cigarettes?

su\_p\_days\_drunk\_cv On how many days were you drunk?

su\_p\_mj\_smoke\_cv About how many times per day did you smoke a marijuana or cannabis product?

su\_p\_mj\_smoke\_loc\_cv\_\_\_1  
1 Where did you smoke a marijuana or cannabis product? (check all that apply) : 1 In the house

su\_p\_mj\_smoke\_loc\_cv\_\_\_2  
2 Where did you smoke a marijuana or cannabis product? (check all that apply) : 2 balcony / deck

su\_p\_mj\_smoke\_loc\_cv\_\_\_3  
3 Where did you smoke a marijuana or cannabis product? (check all that apply) : 3 In the car



|                            |                                                                                                                                                                |
|----------------------------|----------------------------------------------------------------------------------------------------------------------------------------------------------------|
| su_p_mj_smoke_loc_cv___4   | Where did you smoke a marijuana or cannabis product? (check all that apply) : 4 Outside                                                                        |
| su_p_mj_smoke_loc_cv___5   | Where did you smoke a marijuana or cannabis product? (check all that apply) : 5 Other                                                                          |
| su_p_mj_use_cv             | About how many times per day did you use a marijuana or cannabis product?                                                                                      |
| su_p_mj_vape_loc_cv___1    | Where did you vape a marijuana or cannabis product? (check all that apply) : 1 In the house                                                                    |
| su_p_mj_vape_loc_cv___2    | Where did you vape a marijuana or cannabis product? (check all that apply) : 2 balcony / deck                                                                  |
| su_p_mj_vape_loc_cv___3    | Where did you vape a marijuana or cannabis product? (check all that apply) : 3 In the car                                                                      |
| su_p_mj_vape_loc_cv___4    | Where did you vape a marijuana or cannabis product? (check all that apply) : 4 Outside                                                                         |
| su_p_mj_vape_loc_cv___5    | Where did you vape a marijuana or cannabis product? (check all that apply) : 5 Other                                                                           |
| su_p_mj_vape_use_cv        | How many times per day did you vape a marijuana or cannabis product?                                                                                           |
| su_p_other_drugs_cv        | On how many days did you use other drugs for nonmedical purposes (such as cocaine methamphetamine and other drugs not counting alcohol nicotine or marijuana)? |
| su_p_rx_od_cv              | About how many times per day did you take a prescription pill above the recommended dose or that was not prescribed to you?                                    |
| su_p_vape_loc_cv___1       | Where did you use vapes? (check all that apply) : 1 In the house                                                                                               |
| su_p_vape_loc_cv___2       | Where did you use vapes? (check all that apply) : 2 Balcony / deck                                                                                             |
| su_p_vape_loc_cv___3       | Where did you use vapes? (check all that apply) : 3 In the car                                                                                                 |
| su_p_vape_loc_cv___4       | Where did you use vapes? (check all that apply) : 4 Outside                                                                                                    |
| su_p_vape_loc_cv___5       | Where did you use vapes? (check all that apply) : 5 Other                                                                                                      |
| su_p_vape_use_cv           | About how many times per day did you vape using an electronic nicotine or vaping product such as e-cigarettes vape pen or JUUL ?                               |
| think_someone_close_get_cv | I think it is likely that someone very close to me will be hospitalized or die from the coronavirus                                                            |
| think_will_get_cv          | I think it is likely that someone very close to me will get coronavirus                                                                                        |
| think_will_hospitalized_cv | I think it is likely I will be hospitalized or die from the coronavirus                                                                                        |
| worry_about_cv             | I think all of this worry about coronavirus is blown out of proportion                                                                                         |
| absent_reason_cv___1       | Please check all reasons your child did not do school this week: 1 My child was too sick to go to school                                                       |

|                          |                                                                                                                                                                                                                                                                                                                                                       |
|--------------------------|-------------------------------------------------------------------------------------------------------------------------------------------------------------------------------------------------------------------------------------------------------------------------------------------------------------------------------------------------------|
| absent_reason_cv__2      | Please check all reasons your child did not do school this week: 2 I do not feel safe sending him/her to school right now because of coronavirus                                                                                                                                                                                                      |
| absent_reason_cv__3      | Please check all reasons your child did not do school this week: 3 My child is too worried to go to school because of coronavirus                                                                                                                                                                                                                     |
| absent_reason_cv__4      | Please check all reasons your child did not do school this week: 4 Other                                                                                                                                                                                                                                                                              |
| assure_child_cv          | I have told my child that everything will be okay                                                                                                                                                                                                                                                                                                     |
| asthma_medi_corti_cv     | Inhaled corticosteroids (like Qvar Pulmicort or Flovent)                                                                                                                                                                                                                                                                                              |
| asthma_medi_inhaler_cv   | Asthma inhalers (like Albuterol or Advair)                                                                                                                                                                                                                                                                                                            |
| asthma_medi_injection_cv | Medications by injection (Xolair Nucala Fasenra Cinquil and Duplxent)                                                                                                                                                                                                                                                                                 |
| asthma_medi_steriods_cv  | Steroids you take by mouth to maintain your asthma                                                                                                                                                                                                                                                                                                    |
| asthma_medi_zpak_cv      | Azithromycin (Zpak) and clarithromycin (Blaxin)                                                                                                                                                                                                                                                                                                       |
| avoid_discussing_cv      | I have asked others to avoid discussing coronavirus and its potential impacts in front of my child                                                                                                                                                                                                                                                    |
| avoid_talking_about_cv   | I have avoided talking to my child about coronavirus                                                                                                                                                                                                                                                                                                  |
| bio_dad_hos_cv           | Did the biological father require hospitalization?                                                                                                                                                                                                                                                                                                    |
| bio_mom_hos_cv           | Did the biological mother require hospitalization?                                                                                                                                                                                                                                                                                                    |
| caregiver_cv             | Is there another adult who usually helps with caregiving responsibilities?                                                                                                                                                                                                                                                                            |
| caregiver_help_cv        | Has the coronavirus situation interfered with the extent to which this person is helping?                                                                                                                                                                                                                                                             |
| child_asthma_medi_cv     | Since March has your child's asthma medications changed or has she/he stopped taking some asthma medications?                                                                                                                                                                                                                                         |
| child_asthma_symptoms_cv | Since March has your child's asthma symptoms (e.g. wheezing coughing shortness of breath chest tightness or pain):                                                                                                                                                                                                                                    |
| child_avg_elec_min_cv    | On an average day this week how much Minutes per day does your child spend in TOTAL on a computer cell phone tablet iPod or other electronic device? Do NOT include time spent on school related work but do include watching TV shows or videos texting or chatting playing games or visiting social networking sites? (Facebook Twitter Instagram). |
| child_avg_elec_time_2_cv | On an average day this week how much Hours per day does your child spend in TOTAL on a computer cell phone tablet iPod or other electronic device? Do NOT include time spent on school related work but do include watching TV shows or videos texting or chatting playing games or visiting social networking sites? (Facebook Twitter Instagram).   |

child\_avg\_elec\_time\_cv On an average day this week how much Hours per day does your child spend in TOTAL on a computer cell phone tablet iPod or other electronic device? Do NOT include time spent on school related work but do include watching TV shows or videos texting or chatting playing games or visiting social networking sites? (Facebook Twitter Instagram).

child\_breaking\_rules\_cv My child is breaking rules we have made in relation to coronavirus

child\_care\_cv During this period of school closure are you the primary (or co-primary) person responsible for your child's care during the day?

child\_care\_impact\_cv\_\_1 In what ways has the COVID-19 outbreak impacted your child's overall healthcare? (check all that apply) : 1 My child did not go to healthcare appointments because I was concerned about him/her entering the healthcare provider's office

child\_care\_impact\_cv\_\_2 In what ways has the COVID-19 outbreak impacted your child's overall healthcare? (check all that apply) : 2 My child's healthcare provider cancelled appointments

child\_care\_impact\_cv\_\_3 In what ways has the COVID-19 outbreak impacted your child's overall healthcare? (check all that apply) : 3 My child's healthcare provider changed to phone or online visits

child\_care\_impact\_cv\_\_4 In what ways has the COVID-19 outbreak impacted your child's overall healthcare? (check all that apply) : 4 My child's healthcare provider told him/her to a self-isolate or quarantine

child\_care\_impact\_cv\_\_5 In what ways has the COVID-19 outbreak impacted your child's overall healthcare? (check all that apply) : 5 None of these apply

child\_cosymptoms\_cv\_\_1 During that time which of the following symptoms did your child also have? (check all that apply) : 1 Sore throat

child\_cosymptoms\_cv\_\_2 During that time which of the following symptoms did your child also have? (check all that apply) : 2 Headache

child\_cosymptoms\_cv\_\_3 During that time which of the following symptoms did your child also have? (check all that apply) : 3 Muscle or body aches

child\_cosymptoms\_cv\_\_4 During that time which of the following symptoms did your child also have? (check all that apply) : 4 Runny nose

child\_cosymptoms\_cv\_\_5 During that time which of the following symptoms did your child also have? (check all that apply) : 5 Fatigue and excessive sleepiness

child\_cosymptoms\_cv\_\_6 During that time which of the following symptoms did your child also have? (check all that apply) : 6 Diarrhea nausea or vomiting

child\_cosymptoms\_cv\_\_\_7 During that time which of the following symptoms did your child also have? (check all that apply) :  
7 Loss of sense of smell or taste

child\_cosymptoms\_cv\_\_\_8 During that time which of the following symptoms did your child also have? (check all that apply) :  
8 Itchy/red eyes

child\_cosymptoms\_cv\_\_\_9 During that time which of the following symptoms did your child also have? (check all that apply) :  
9 None of the above

child\_covid\_cv Has your healthcare provider ever told you that your child has or might have COVID-19 (coronavirus)?

child\_diag\_asthma\_cv Has your child ever been diagnosed with asthma?

child\_diagnosis\_cv How was s/he (your child) diagnosed with asthma?  
Being afraid of an illness or virus has gotten in the way of my child enjoying their life (e.g. caused fights in the house kept them from connecting with others made them feel isolated or hopeless about the future etc.).

child\_enjoy\_cv

child\_fall\_asleep\_time\_cv How long after going to bed does your child usually fall asleep?

child\_fear\_cv Being afraid of an illness or virus has caused my child to experience very strong emotions (e.g. anger anxiety sadness irritable feelings etc.).

child\_frustrated\_cv My child is frustrated with changes or rules we have made in relation to coronavirus

child\_gaming\_min\_cv through multiple-player video games : minutes

child\_gaming\_time\_2\_cv through multiple-player video games : hours (Question round 3 and 4)

child\_gaming\_time\_cv through multiple-player video games : hours ( Question for round 1 and 2)

child\_news\_source\_cv What is the most likely news network for this information in your home? (include both watching on a television set or streaming online)

child\_news\_time\_cv Over the past week about how much time per day do you think your child has been getting news from television news sources about the coronavirus and its impact? (hours)

child\_past\_risk\_cv\_\_\_1 In the two weeks before your child had symptoms did he/she: (check all that apply) : 1 Have contact with someone who tested positive for COVID-19

child\_past\_risk\_cv\_\_\_2 In the two weeks before your child had symptoms did he/she: (check all that apply) : 2 Have contact with someone who likely had COVID-19 (that is they were not tested but had symptoms or was told by a healthcare provider they likely had it)

child\_past\_risk\_cv\_\_\_3 :In the two weeks before your child had symptoms did he/she: (check all that apply) : 3 Travel to a different state or country

|                               |                                                                                                                                                                                                              |
|-------------------------------|--------------------------------------------------------------------------------------------------------------------------------------------------------------------------------------------------------------|
| child_past_risk_cv___4        | :In the two weeks before your child had symptoms did he/she: (check all that apply) : 4 None of the above                                                                                                    |
| child_phys_activity_days_cv   | On how many days per week did your child do moderate or vigorous physical activities like heavy lifting running aerobics or bicycling?                                                                       |
| child_phys_activity_min_cv    | How much time did your child usually spend doing moderate or vigorous physical activities on one of those days? (minutes)                                                                                    |
| child_phys_activity_time_2_cv | How much time did your child usually spend doing moderate or vigorous physical activities on one of those days? (Hours)                                                                                      |
| child_phys_activity_time_cv   | How much time did your child usually spend doing moderate or vigorous physical activities on one of those days? (Hours) (round 1 and 2)                                                                      |
| child_reluc_cv                | My child goes to bed reluctantly                                                                                                                                                                             |
| child_sched_cv                | I have designed a daily schedule for my child while school is out                                                                                                                                            |
| child_separate_cv             | Is your child having a hard time being separated from anyone close due to the impact of coronavirus? Le cuesta a su hijo/a estar separado/separada de alguien cercano debido al impacto del coronavirus      |
| child_serious_cv              | My child seems to be taking coronavirus and social distancing" seriously                                                                                                                                     |
| child_sleep_again             | After waking up in the night my child has difficulty to fall asleep again                                                                                                                                    |
| child_sleep_amount_cv         | How many hours of sleep does your child get on most nights?                                                                                                                                                  |
| child_sleep_anxiety_cv        | My child feels anxious or afraid when falling asleep                                                                                                                                                         |
| child_sleep_difficult_cv      | My child has difficulty getting to sleep at night                                                                                                                                                            |
| child_social_media_min_cv     | social media (including Facebook Youtube TikTok Snapchat etc) :Minutes                                                                                                                                       |
| child_social_media_time_2_cv  | social media (including Facebook Youtube TikTok Snapchat etc) :Hours                                                                                                                                         |
| child_social_media_time_cv    | social media (including Facebook Youtube TikTok Snapchat etc) :Hours (round 1 and 2)                                                                                                                         |
| child_symptom_actions_cv___1  | Which of the following ever occurred as a result of your child's symptoms? (check all that apply) : 1 My child was kept overnight in a hospital because a healthcare provider thought the child had COVID-19 |
| child_symptom_actions_cv___2  | Which of the following ever occurred as a result of your child's symptoms? (check all that apply) : 2 My child saw a healthcare provider in person such as in a clinic doctor's office urgent care ER        |
| child_symptom_actions_cv___3  | Which of the following ever occurred as a result of your child's symptoms? (check all that apply) : 3 My child or I spoke to a healthcare provider over the phone email or online                            |

|                              |                                                                                                                                                             |
|------------------------------|-------------------------------------------------------------------------------------------------------------------------------------------------------------|
| child_symptom_actions_cv___4 | Which of the following ever occurred as a result of your child's symptoms? (check all that apply) : 4<br>My child or I self-isolated or quarantined at home |
| child_symptom_actions_cv___5 | Which of the following ever occurred as a result of your child's symptoms? (check all that apply) : 5<br>None of the above                                  |
| child_symptoms_cv___1        | Which of the following symptoms has your child had at any point in time since March 2020? (check all that apply) : 1 Fever or chills                        |
| child_symptoms_cv___2        | Which of the following symptoms has your child had at any point in time since March 2020? (check all that apply) : 2 Cough                                  |
| child_symptoms_cv___3        | Which of the following symptoms has your child had at any point in time since March 2020? (check all that apply) : 3 Shortness of breath/Difficult          |
| child_symptoms_cv___4        | Which of the following symptoms has your child had at any point in time since March 2020? (check all that apply) : 4 None of the above                      |
| child_test_1_cv              | Results of child's COVID-19 Test 1                                                                                                                          |
| child_test_2_cv              | Results of child's COVID-19 Test 2                                                                                                                          |
| child_test_3_cv              | Results of child's COVID-19 Test 3                                                                                                                          |
| child_tested_cv              | Has your child been tested for COVID-19 (for the active virus)?                                                                                             |
| child_texting_min_cv         | through texting : Minutes                                                                                                                                   |
| child_texting_time_2_cv      | through texting :Hours (Question round 3 and 4)                                                                                                             |
| child_texting_time_cv        | through texting :Hours ( Question for round 1 and 2)                                                                                                        |
| child_video_chat_min_cv      | through video chatting (Facetime Skype Zoom Hangouts etc) : Minutes                                                                                         |
| child_video_chat_time_2_cv   | through video chatting (Facetime Skype Zoom Hangouts etc) : hours                                                                                           |
| child_video_chat_time_cv     | through video chatting (Facetime Skype Zoom Hangouts etc) : hours (round 1 and 2)                                                                           |
| child_wake_up                | My child wakes up more than twice per night                                                                                                                 |
| child_worried_about_cv       | My child seems worried about non-health related consequences of coronavirus (e.g. financial)                                                                |
| child_worry_cv               | My child seems worried about becoming ill or that others they know will become ill with coronavirus                                                         |
| custody_cv                   | Has your custody situation changed since the coronavirus/COVID-19 crisis?                                                                                   |
| diag_confidence_cv           | How confident are you in this coronavirus diagnosis?                                                                                                        |
| encouraged_cv                | I have encouraged my child not to focus on coronavirus or its impacts on people and the world                                                               |

|                                 |                                                                                                                           |
|---------------------------------|---------------------------------------------------------------------------------------------------------------------------|
| extra_material_cv               | Did you or your child supplement the educational materials provided by the school with other sources (e.g. Khan Academy)? |
| fam_covid_yn_cv                 | Did this family member test positive for coronavirus (COVID-19)?                                                          |
| fam_diag_cv                     | Number of immediate family members (same household) diagnosed with coronavirus                                            |
| fam_member_relation_p_c<br>v__1 | Who was this family member in relation to your child? : 1 Child's Biological Mother                                       |
| fam_member_relation_p_c<br>v__2 | Who was this family member in relation to your child? : 2 Child's Biological Father                                       |
| fam_member_relation_p_c<br>v__3 | Who was this family member in relation to your child? : 3 Adoptive Parent                                                 |
| fam_member_relation_p_c<br>v__4 | Who was this family member in relation to your child? : 4 Child's Custodial Parent                                        |
| fam_member_relation_p_c<br>v__5 | Who was this family member in relation to your child? : 5 Child's Biological Sibling                                      |
| fam_member_relation_p_c<br>v__6 | Who was this family member in relation to your child? : 6 Other                                                           |
| fam_sick_severity_cv            | Rate the symptoms of the person in your family who was most sick:                                                         |
| graded_cv                       | Is your child being graded for their schoolwork?                                                                          |
| homework_help_time_cv           | How many hours per day did you spend helping your child access or complete their schoolwork?                              |
| homework_time_cv                | On an average weekday how many hours per day did your child spend doing schoolwork?                                       |
| hours_homework_time_cv          | In the past week how many hours per day did your child spend doing school or schoolwork?                                  |
| hours_online_self_cv            | In the past week how many hours per day did your child: Self-study with online material                                   |
|                                 | In the past week how many hours per day did your child: Guided screen-sharing instruction by teachers                     |
| hours_teaching_cv               | In the past week how many hours per day did your child: Self-study with paper school packet and textbooks                 |
| hours_textbook_self_cv          |                                                                                                                           |
| hours_video_cv                  | In the past week how many hours per day did your child: Video-instruction by teachers                                     |
| household_ability_cv            | Is your role caring for your child conflicting with your household responsibilities?                                      |
| iep_cv                          | Does your child have an IEP or 504 plan?                                                                                  |
| iep_provide_cv                  | Did the school continue to provide services?                                                                              |

|                         |                                                                                                                                                                  |
|-------------------------|------------------------------------------------------------------------------------------------------------------------------------------------------------------|
| internet_access_cv      | Do you have internet access at home?                                                                                                                             |
| material_access_cv      | Were you or your child able to access school provided materials (e.g. online through pick up some other way)                                                     |
| p_feeling_cv            | I discussed with my child my own feelings about coronavirus and its impact on people and the world                                                               |
| p_safety_cv             | I have expressed concern to my child that they might not be fully safe from coronavirus                                                                          |
| percent_live_cv         | What percent of the time did your child live with you?                                                                                                           |
| prepared_child_cv       | I have prepared my child for our lives to change significantly                                                                                                   |
| prim_cv                 | You are the: Usted es:                                                                                                                                           |
| school_at_home_cv       | Is your child currently doing some or all of their school-at-home?                                                                                               |
| school_close_cv         | Has your child's school been closed physically due to coronavirus?                                                                                               |
| school_close_date_cv    | Last date of in-person class                                                                                                                                     |
| school_close_date_dk_cv | Last date of in-person class: Other Reasons                                                                                                                      |
| school_difficulty       | How easy or difficult was it for your child to complete school work remotely? Que tan facil o dificil fue para su hijo/a completar su trabajo escolar desde casa |
| school_engage_cv__1     | How is your child engaging in their school's curriculum (check all that apply) : 1 Self-study with online material                                               |
| school_engage_cv__2     | How is your child engaging in their school's curriculum (check all that apply) : 2 Self-study with paper school packet and textbooks                             |
| school_engage_cv__3     | How is your child engaging in their school's curriculum (check all that apply) : 3 Guided screen-sharing instruction by teachers                                 |
| school_engage_cv__4     | How is your child engaging in their school's curriculum (check all that apply) : 4 Video-instruction by teachers                                                 |
| school_engage_cv__5     | How is your child engaging in their school's curriculum (check all that apply) : 5 No formal school curriculum was provided                                      |
| school_engage_cv__6     | How is your child engaging in their school's curriculum (check all that apply) : 6 Not sure                                                                      |
| school_nutrition_cv     | Did your child get breakfast and/or lunch from your school?                                                                                                      |
| school_prep_cv          | How prepared do you think your child will be for next school year?                                                                                               |
| school_prep_new_cv      | How prepared do you think your child is for this new school year?                                                                                                |
| school_reopen_date_cv   | Date your child's school re-opened:                                                                                                                              |



|                          |                                                                                                                                         |
|--------------------------|-----------------------------------------------------------------------------------------------------------------------------------------|
| school_reopen_date_dk_cv | Has your child's school re-opened?                                                                                                      |
| separate_people_cv__1    | Check all that apply(child had a hard time being separated due to the impact of coronavirus): 1<br>Parent/guardian                      |
| separate_people_cv__2    | Check all that apply(child had a hard time being separated due to the impact of coronavirus): 2<br>Grandparent(s)                       |
| separate_people_cv__3    | Check all that apply(child had a hard time being separated due to the impact of coronavirus): 3<br>Sibling/half-sibling/step-sibling(s) |
| separate_people_cv__4    | Check all that apply(child had a hard time being separated due to the impact of coronavirus): 4<br>Other relative(s)                    |
| separate_people_cv__5    | Check all that apply(child had a hard time being separated due to the impact of coronavirus): 5<br>Friend(s)                            |
| separate_people_cv__6    | Check all that apply(child had a hard time being separated due to the impact of coronavirus): 6<br>Teacher(s)                           |
| separate_people_cv__7    | Check all that apply(child had a hard time being separated due to the impact of coronavirus): 7<br>Coach(es)                            |
| separate_people_cv__8    | Check all that apply(child had a hard time being separated due to the impact of coronavirus): 8<br>Other adult                          |
| talk_cancel_cv           | Cancellation of school and other events                                                                                                 |
| talk_conserve_cv         | Conserving food or other items                                                                                                          |
| talk_isolate_cv          | Avoiding visiting friends or family                                                                                                     |
| talk_mask_cv             | The importance of wearing a mask                                                                                                        |
| talk_race_cv             | Racism or discrimination in relation to coronavirus                                                                                     |
| talk_social_distance_cv  | The importance of social distancing                                                                                                     |
| talk_symptoms_cv         | The symptoms of coronavirus                                                                                                             |
| talk_vuln_cv             | Protecting the elderly or other vulnerable people                                                                                       |
| talk_wash_cv             | The importance of hand washing for preventing the spread of germs                                                                       |
| tool_access_cv           | Does your child have access to the things needed(such as a laptop) to do their school work at home?                                     |
| went_to_school_cv        | Has your child participated in school the past week?                                                                                    |
| work_ability_cv          | Is your role caring for your child conflicting with your work responsibilities?                                                         |

|                            |                                                                                                                                                  |
|----------------------------|--------------------------------------------------------------------------------------------------------------------------------------------------|
| su_p_vape_loc_cv___888     | Where did you use vapes? (check all that apply) : 888 Question has not been asked due to previous question response.                             |
| su_p_mj_vape_loc_cv___888  | Where did you vape a marijuana or cannabis product? (check all that apply) : 888 Question has not been asked due to previous question response.  |
| su_p_mj_smoke_loc_cv___888 | Where did you smoke a marijuana or cannabis product? (check all that apply) : 888 Question has not been asked due to previous question response. |
| su_p_cig_loc_cv___888      | Where did you use cigarettes? (check all that apply) :888 Question has not been asked due to previous question response.                         |
| collection_title           | collection_title                                                                                                                                 |
| study_cohort_name          | study_cohort_name                                                                                                                                |

## **eMethods (cont)**

### *Use of CCA*

We opted for canonical correlation analysis (CCA) as the method suggests itself for probing cross-associations between variable sets in a transparent and intuitively interpretable way (as it is a linear model). While we considered a hypothesis-driven approach, we ultimately selected a hypothesis-agnostic (i.e., data-driven approach). In other words, given the highly unprecedented nature of the COVID-19 pandemic and the associated response measures, we selected an approach that could simultaneously assess all possible hypotheses. While data-driven, we note that CCA is nonetheless a linear model and hence transparent to the same degree that linear regression and Pearson correlation analyses are transparent. It is for this reason that we selected CCA over other, more ‘black box’ algorithms; e.g., recurrent neural networks. As such, CCA allows for transparent assessment of relationships between high dimensional variable sets, identifying cohesive ‘modes’ of variation that link between each dataset.

### *Type II error and CCA:*

Importantly, in CCA, statistical significance is evaluated at the mode level; not at the level of individual variables of a given mode. This is important, as it means that our CCA approach did not involve null hypotheses testing of any single questionnaire items or health indicators. Rather, our CCA analyses is completely multivariate—in that it simultaneously considered the relationship between all baseline items and all COVID-19 questionnaire items. In other words, the null hypothesis we evaluated was whether an empirical multivariate relationship between baseline assessments and COVID-19 assessments would be detectable (i.e., robust to other sources of variance). Our elected approach therefore appropriately handled Type I and Type II errors in the context of the resulting CCA components.

We further note that our approach is consistent with other recent (non-COVID-related) analyses in general from our own <sup>7,8</sup> and others’ <sup>9,10</sup> population neuroscience studies, including recent analyses of ABCD <sup>11</sup>.

### *Data cleaning*

We conducted the following standard data cleaning steps: (1) categorical data columns were transformed to separate binary-encoded data columns; (2) non-response entries (e.g., ‘999’ or ‘777’) were converted to indicate missing values; (3) data columns with >50% missing values were removed entirely; (4) variables for which <250 out of ~10,000 families showed a response different from the majority response were excluded; and (5) missing data imputation was performed using non-parametric single-column replacement.

### *Data preprocessing*

To prepare for multivariate pattern analysis, the full collection of baseline items underwent commonly carried out cleaning steps (details in SI). These recommended data cleaning procedures

are consistent with those used in similar prior multivariate pattern analyses<sup>12,13</sup>. To avoid overfitting, principal component analysis was applied to the final set of baseline and COVID-19 questionnaire items, consistent with prior work and current statistical practice<sup>14-16</sup>.

### *Defining vaccination rates*

State-level vaccination rates were defined using CDC data, obtained at <https://covid.cdc.gov/covid-data-tracker/#vaccinations> and accessed on May 3<sup>rd</sup>, 2021.

### Python Code for Analyses

#### **PCA:**

```
# In [27]: X_ss.shape
# Out[27]: (9267, 6402)

# In [28]: Y_ss.shape
# Out[28]: (9267, 281)

# X_std = X_ss.std(0) # get p lower than n to prepare for PCA
# idx_topvar = np.argsort(X_std)[::-1]
# X_ss = X_ss[:, idx_topvar[:7500]]
# X_cols = np.array(X_cols)[idx_topvar[:7500]]

x_pca = PCA(n_components=250)
y_pca = PCA(n_components=50)

X_ss_pca = x_pca.fit_transform(X_ss)
Y_ss_pca = y_pca.fit_transform(Y_ss)
```

#### **CCA:**

```
#
n_permutations = 1000
cur_X = np.array(X_ss_pca)
cur_Y = np.array(Y_ss_pca)
perm_rs = np.random.RandomState(0)
perm_Rs = []
perm_scores = []
n_except = 0
for i_iter in range(n_permutations):
    print(i_iter + 1)
```

```

# perm_rs.shuffle(cur_Y)

cur_X_perm = np.array([perm_rs.permutation(sub_entry) for sub_entry in cur_X])
# cur_X_perm = np.array([perm_rs.permutation(col_entry) for col_entry in cur_X.T]).T
# perm_idx = np.arange(len(cur_Y))
# perm_rs.shuffle(perm_idx)
# cur_Y_perm = cur_Y[perm_idx]

# same procedure, only with permuted subjects on the right side
try:
    perm_cca = CCA(n_components=n_comp, scale=True)

    # perm_inds = np.arange(len(Y_netmet))
    # perm_rs.shuffle(perm_inds)
    # perm_cca.fit(X_nodenode, Y_netnet[perm_inds, :])
    perm_cca.fit(cur_X_perm, cur_Y)

    perm_R = np.array([pearsonr(X_coef, Y_coef)[0] for X_coef, Y_coef in
        zip(perm_cca.x_scores_.T, perm_cca.y_scores_.T)])
    cur_score = perm_cca.score(cur_X, cur_Y)
    print(np.sort(perm_R)[::-1][:10])
    print(cur_score)
    perm_Rs.append(perm_R)
    perm_scores.append(cur_score)
except:
    n_except += 1
    perm_Rs.append(np.zeros(n_keep))
perm_Rs = np.array(perm_Rs)

pvals = []
for i_coef in range(n_comp):
    cur_pval = (1. + np.sum(perm_Rs[1:, 0] > actual_Rs[i_coef])) / n_permutations
    pvals.append(cur_pval)
    print(cur_pval)
pvals = np.array(pvals)
print('%i CCs are significant at p<0.05' % np.sum(pvals < 0.05))
print('%i CCs are significant at p<0.01' % np.sum(pvals < 0.01))
print('%i CCs are significant at p<0.001' % np.sum(pvals < 0.001))

# 9 CCs are significant at p<0.05
# 9 CCs are significant at p<0.01
# 0 CCs are significant at p<0.001

# pvals = []
# for i_coef in range(n_comp): # COMP-WISE comparison to permutation results !!!

```

```

# cur_pval = (np.sum(perm_Rs[:, i_coef] > actual_Rs[i_coef])) / n_permutations
# pvals.append(cur_pval)
# # print cur_pval
# pvals = np.array(pvals)[inds_max_to_min]
# print(pvals)
# print('%i CCs are significant at p<0.05' % np.sum(pvals < 0.05))
# print('%i CCs are significant at p<0.01' % np.sum(pvals < 0.01))
# print('%i CCs are significant at p<0.001' % np.sum(pvals < 0.001))

# CCA
from sklearn.cross_decomposition import CCA, PLSRegression

n_comp = 10
# est = PLSRegression(n_components=n_comp, scale=False) # ALWAYS de-means internally
!!
est = CCA(n_components=n_comp, scale=True) # ALWAYS de-means internally !!
est.fit(X_ss_pca, Y_ss_pca)
# est.fit(X_ss, Y_ss)

actual_Rs = np.array([pearsonr(X_coef, Y_coef)[0] for X_coef, Y_coef in
    zip(est.x_scores_.T, est.y_scores_.T)])
inds_max_to_min = np.argsort(actual_Rs)[::-1]
actual_Rs_sorted = actual_Rs[inds_max_to_min]
print(actual_Rs_sorted[:n_comp])

# no PCA (original analysis, overfitting)
# [0.99970832 0.98004634 0.85277093 0.80367204 0.73783929 0.71751736
# 0.70893447 0.70248758 0.69439959 0.67603569]
# with PCA (100, 50)
# [0.80475812 0.62495744 0.55836287 0.55529943 0.52400954 0.48935878
# 0.44203503 0.41503804 0.39069389 0.35767381]
# with PCA (250, 50)
# [0.80308278 0.62164767 0.58197873 0.55747482 0.52265651 0.48801407
# 0.44204226 0.43137429 0.3704658 0.34755219]

OUTDIR = 'results_crossdecomp_repl3'

```

**Example code used for cross-validated predictions of ABCD variables (Figures 2 & 4):**

```

# Racism or discrimination in relation to coronavirus?
from sklearn.linear_model import LogisticRegression
from sklearn.svm import SVC
from sklearn.model_selection import StratifiedKFold, cross_val_score

lr = LogisticRegression(fit_intercept=True)

```

```

tar_y = np.squeeze(Y[:, Y_cols == 'talk_race_cv'] >= 4).astype(np.int)
folder = StratifiedKFold(shuffle=True, n_splits=10)
acc = cross_val_score(
    estimator=lr,
    X=est.y_scores_, y=tar_y,
    cv=folder,
    n_jobs=4)

print(acc.mean())
print(acc.std())

lr.fit(X=est.y_scores_, y=tar_y)
print(lr.score(X=est.y_scores_, y=tar_y))
# 1.0

bs_coefs = []
np.random.seed(0)
for i_bs in range(100):
    bs_idx = np.random.randint(0, len(tar_y), len(tar_y))

    lr.fit(est.y_scores_[bs_idx], tar_y[bs_idx])
    is_acc = lr.score(est.y_scores_[bs_idx], tar_y[bs_idx])
    print(is_acc)

print(idx_OOB.sum())
idx_OOB = ~np.in1d(np.arange(len(tar_y)), bs_idx)
oob_acc = lr.score(est.y_scores_[idx_OOB], tar_y[idx_OOB])

bs_coefs.append(lr.coef_)

bs_coefs = np.squeeze(bs_coefs)
plt.figure(figsize=(6, 4))
plt.boxplot(bs_coefs)
plt.xlabel('mode')
plt.ylabel('never/occasionally vs. frequently\n(mean effect +/- bootstrap population intervals)')
plt.title(f'Racism or discrimination in relation to coronavirus?\n')
# plt.title('Classifying witnessing of racial discrimination from COVID19 items\nAccuracy in
new families: %d.2%%' % (np.mean(oob_acc) * 100))
plt.tight_layout()
plt.savefig(OUTDIR + f'/boxplot_racism_discr_classif.png')
plt.close('all')

```

**Example code used for cross-validated predictions of external variables (Figure 5):**

```

y_dem = np.array(dfbase_['election_2020'] == 'democrat')
from sklearn.linear_model import LogisticRegression
lr = LogisticRegression(fit_intercept=True)
bs_coefs = []
np.random.seed(0)
for i_bs in range(100):
    bs_idx = np.random.randint(0, len(y_dem), len(y_dem))

    lr.fit(est.y_scores_[bs_idx], y_dem[bs_idx])
    is_acc = lr.score(est.y_scores_[bs_idx], y_dem[bs_idx])
    print(is_acc)

    print(idx_OOB.sum())
    idx_OOB = ~np.in1d(np.arange(len(y_dem)), bs_idx)
    oob_acc = lr.score(est.y_scores_[idx_OOB], y_dem[idx_OOB])

    bs_coefs.append(lr.coef_)

bs_coefs = np.squeeze(bs_coefs)
plt.figure(figsize=(6, 4))
plt.boxplot(bs_coefs)
plt.xlabel('mode')
plt.ylabel('republican vs. democrat\n(mean effect +/- bootstrap population intervals)')
plt.title('Classifying political affiliation from COVID19 items\nAccuracy in new families:
%d.2%%' % (np.mean(oob_acc) * 100))
plt.tight_layout()
plt.savefig(OUTDIR + f'/boxplot_election_2020_classif.png')
plt.savefig(OUTDIR + f'/boxplot_election_2020_classif.pdf')
plt.savefig(OUTDIR + f'/boxplot_election_2020_classif.eps')
plt.savefig(OUTDIR + f'/boxplot_election_2020_classif.tiff')

plt.ylim(-1, +1)
plt.savefig(OUTDIR + f'/boxplot_election_2020_classif_fixedylim.png')
plt.savefig(OUTDIR + f'/boxplot_election_2020_classif_fixedylim.pdf')
plt.savefig(OUTDIR + f'/boxplot_election_2020_classif_fixedylim.eps')
plt.savefig(OUTDIR + f'/boxplot_election_2020_classif_fixedylim.tiff')
plt.close('all')

```



**eTable 4. Top 20 Loadings Mode 1 ABCD Baseline**

| <b>Variable</b>                      | <b>Loading</b> | <b>Description</b>                                                                                     |
|--------------------------------------|----------------|--------------------------------------------------------------------------------------------------------|
| household.income [<50K]              | 0.074922       | Household combined income (baseline only)                                                              |
| household.income.bl [<50K]           | 0.074922       | Household combined income (baseline value carry forward)                                               |
| latent_factor_ss_general_ses         | -0.07408       | Latent SES variable                                                                                    |
| race_ethnicity White                 | -0.07401       | Race Ethnicity (Child)                                                                                 |
| household.income [≥100K]             | -0.0714        | Household combined income (baseline only)                                                              |
| household.income.bl [≥100K]          | -0.0714        | Household combined income (baseline value carry forward)                                               |
| genetic_ancestry_factor_european     | -0.07062       | Proportion of European ancestry                                                                        |
| meim_ethnic_id_p White/Caucasian     | -0.06867       | In terms of ethnic group, I consider myself to be:                                                     |
| demo_race_a_p 10 not endorsed        | 0.06697        | What race do you consider the child to be?                                                             |
| demo_race_a_p 10 White               | -0.06697       | What race do you consider the child to be?                                                             |
| demo_prnt_race_a_p 10 not endorsed   | 0.064953       | What race do you consider yourself to be? (Parent)                                                     |
| demo_prnt_race_a_p 10 White          | -0.06495       | What race do you consider yourself to be? (Parent)                                                     |
| genetic_ancestry_factor_african      | 0.062154       | Proportion of African ancestry                                                                         |
| high.educ.bl Post Graduate Degree    | -0.05934       | Highest education of parents (baseline value carry forward)                                            |
| high.educ Post Graduate Degree       | -0.05934       | Highest education of parents (baseline only)                                                           |
| race.4level White                    | -0.05837       | 4-level derived race variable (assume invariant overtime)                                              |
| race.6level White                    | -0.05837       | 6-level derived race variable (assume invariant overtime)                                              |
| demo_fam_roster_2c_p Husband or wife | -0.05766       | Person #2, relationship to you (Person #1):                                                            |
| reshist_addr1_adi_pov                | 0.057344       | Residential history derived - Area Deprivation Index: Percentage of families below the poverty level 1 |
| nihtbx_picvocab_theta                | -0.057         | NIH Toolbox Picture Vocabulary Test Age 3+ v2.0 Theta                                                  |

**eTable 5. Top 20 Loadings Mode 1 COVID Baseline**

| <b>Variable</b>        | <b>Loading</b> | <b>Description</b>                                                                                                                                                                                        |
|------------------------|----------------|-----------------------------------------------------------------------------------------------------------------------------------------------------------------------------------------------------------|
| talk_conserve_cv       | 0.214422       | Conserving food or other items                                                                                                                                                                            |
| fam_exp1_cv            | 0.211704       | Were you ever worried about whether your food would run out before you could get more?                                                                                                                    |
| cv_p_select_language 1 | 0.199034       | Espanol? (asking if the assessment should be given in Spanish)                                                                                                                                            |
| fam_exp7_v2_cv         | -0.19874       | If you lost all your current source(s) of household income (your paycheck public assistance or other forms of income) how long could you continue to live at your current address and standard of living? |
| fam_exp2_cv            | 0.190812       | Needed food but couldn't afford to buy it or couldn't afford to get out to get it?                                                                                                                        |
| p_enjoy_cv             | -0.18095       | Are you able to enjoy things?                                                                                                                                                                             |
| fam_exp4_cv            | 0.180214       | Didn't pay the full amount of the rent or mortgage because you could not afford it?                                                                                                                       |
| talk_symptoms_cv       | 0.165456       | The symptoms of coronavirus                                                                                                                                                                               |
| talk_wash_cv           | 0.138453       | The importance of hand washing for preventing the spread of germs                                                                                                                                         |
| fam_exp_racism_cv      | 0.137677       | I am worried that our family will experience racism or discrimination in relation to coronavirus                                                                                                          |
| caregiver_cv           | -0.13681       | Is there another adult who usually helps with caregiving responsibilities?                                                                                                                                |
| p_cope_cv 4            | -0.13617       | In the past week to cope have you done any of the following? (check all that apply) : 4 Exercised (such as walking running or an online exercise class)                                                   |
| money_cv               | 0.134062       | Over the past week: I worried that my family would not have enough money to pay for necessities like clothing or bills.                                                                                   |
| child_sleep_amount_cv  | 0.131658       | How many hours of sleep does your child get on most nights?                                                                                                                                               |
| school_nutrition_cv    | 0.125584       | Did your child get breakfast and/or lunch from your school?                                                                                                                                               |
| outdoor_act_cv         | -0.12348       | Over the past week: I did outdoor activities...                                                                                                                                                           |
| fam_exp3_cv            | 0.122446       | Were without telephone service because you could not afford it?                                                                                                                                           |
| think_will_get_cv      | -0.12194       | I think it is likely that someone very close to me will get coronavirus                                                                                                                                   |
| pets_cv                | -0.11819       | Do you currently have any pets?                                                                                                                                                                           |
| talk_race_cv           | 0.115004       | Racism or discrimination in relation to coronavirus                                                                                                                                                       |

| <b>eTable 6. Top 20 Loadings Mode 2 ABCD Baseline</b> |                |                                                                                                                                                                                                                                |
|-------------------------------------------------------|----------------|--------------------------------------------------------------------------------------------------------------------------------------------------------------------------------------------------------------------------------|
| <b>Variable</b>                                       | <b>Loading</b> | <b>Description</b>                                                                                                                                                                                                             |
| cbcl_select_language_p_<font color="blue">Si          | -0.077532454   | Language selection for assessment, english or spanish                                                                                                                                                                          |
| famhx_3f_yng_p                                        | -0.057205117   | # of younger full siblings (please do not include a co-twin here as ABCD considers twins equal in age)                                                                                                                         |
| medhx_2a_asthma_p_No                                  | -0.054419834   | Asthma?                                                                                                                                                                                                                        |
| demo_roster_p                                         | -0.054065699   | How many people are living at your address?                                                                                                                                                                                    |
| famhx_3a_p                                            | -0.05322943    | # brother (s)                                                                                                                                                                                                                  |
| demo_fam_roster_4c_p Biological son or daughter       | -0.053102153   | Person #4, relationship to you:                                                                                                                                                                                                |
| demo_prnt_marital_p_Married                           | -0.051934463   | Are you now married, widowed, divorced, separated, never married or living with a partner?                                                                                                                                     |
| married yes                                           | -0.051934463   | Parents married? (baseline only)                                                                                                                                                                                               |
| married.bl_yes                                        | -0.051934463   | Parents married? (baseline value carry forward)                                                                                                                                                                                |
| medhx_6l_asthma_p_No                                  | -0.051588787   | Since we last saw you, has she/he been to a doctor for any of these things? Has he/she ever been to a doctor, a nurse, nurse practitioner, the emergency room or a clinic because any of these things happened...Asthma Attack |
| famhx_3b_p                                            | -0.05143859    | # sister (s)                                                                                                                                                                                                                   |
| married.or.livingtogether_yes                         | -0.051382893   | Parents married or live together? (baseline only)                                                                                                                                                                              |
| married.or.livingtogether.bl_yes                      | -0.051382893   | Parents married or live together? (baseline value carry forward)                                                                                                                                                               |
| macvs_ss_r_p                                          | -0.051355074   | MACVS Religion Subscale, Mean: (mex_american1_p + mex_american6_p + mex_american11_p + mex_american15_p + mex_american20_p + mex_american25_p) + mex_american28_p)/7                                                           |
| demo_prnt_empl_p_Stay at Home Parent                  | -0.050692859   | Are you working now, looking for work, retired, stay at home parent, a student, or something else?                                                                                                                             |
| demo_yrs_2_p_Very                                     | -0.048995201   | In general, how important are your child's religious and spiritual beliefs in his/her daily life?                                                                                                                              |
| demo_prnt_prtnr_bio_p_Yes                             | -0.048990372   | Is your partner the child's biological parent?                                                                                                                                                                                 |
| medhx_2b_allergies_p_No                               | -0.048686527   | Has she/he ever been to a doctor for any of these things... Allergies                                                                                                                                                          |
| medhx_2b_allergies_p_Yes                              | 0.048686527    | Has she/he ever been to a doctor for any of these things... Allergies                                                                                                                                                          |
| demo_prnt_empl_time_p_Full time                       | 0.050660639    | Working Full time or Part time?                                                                                                                                                                                                |

**eTable 7. Top 20 Loadings Mode 2 COVID Baseline\***

| Variable                  | Loading  | Description                                                                                                                                                                  |
|---------------------------|----------|------------------------------------------------------------------------------------------------------------------------------------------------------------------------------|
| cv_p_select_language 1    | -0.30112 | Espanol? (asking if the assessment should be given in Spanish)                                                                                                               |
| fam_size_cv               | -0.2262  | How many people are living at your address? INCLUDE yourself and everyone who is living or staying at your place this week.                                                  |
| child_care_impact_cv 3    | 0.159927 | In what ways has the COVID-19 outbreak impacted your child's overall healthcare? (check all that apply) : 3 My child's healthcare provider changed to phone or online visits |
| worry_about_cv            | -0.15813 | I think all of this worry about coronavirus is blown out of proportion                                                                                                       |
| child_fall_asleep_time_cv | 0.15783  | How long after going to bed does your child usually fall asleep?                                                                                                             |
| iep_cv                    | 0.147131 | Does your child have an IEP or 504 plan?                                                                                                                                     |
| school_difficulty         | 0.142848 | How easy or difficult was it for your child to complete school work remotely?                                                                                                |
| work_ability_cv           | 0.142361 | Is your role caring for your child conflicting with your work responsibilities?                                                                                              |
| child_diag_asthma_cv      | 0.13558  | Has your child ever been diagnosed with asthma?                                                                                                                              |
| household_ability_cv      | 0.130615 | Is your role caring for your child conflicting with your household responsibilities?                                                                                         |
| percent_live_cv           | -0.12701 | What percent of the time did your child live with you?                                                                                                                       |
| prim_cv                   | 0.122484 | You are the:                                                                                                                                                                 |
| child_sleep_amount_cv     | 0.121571 | How many hours of sleep does your child get on most nights?                                                                                                                  |
| fam_actions_cv 7          | -0.12119 | In the past week our family has (check all that apply; by your choice rather than because it's closed): 7 Avoided restaurant take-out                                        |
| encouraged_cv             | -0.12038 | I have encouraged my child not to focus on coronavirus or its impacts on people and the world                                                                                |
| caregiver_cv              | -0.12035 | During this period of school closure are you the primary (or co-primary) person responsible for your child's care during the day?                                            |
| mctq_fd_min_to_sleep_cv   | 0.115914 | Report on your typical sleep behavior over the past week. : I need _____ minutes to fall asleep.                                                                             |
| homework_help_time_cv     | 0.114689 | How many hours per day did you spend helping your child access or complete their schoolwork?                                                                                 |
| child_texting_time_cv     | 0.113975 | through texting :Hours                                                                                                                                                       |
| school_prep_cv            | -0.1122  | How prepared do you think your child will be for next school year?                                                                                                           |

\*All of the top 20 baseline items for Mode 2 corresponding to language selection (English vs. Spanish). Given this redundancy, the top 20 unique items are listed here. Note that inclusion of redundant items does not influence CCA results.

| <b>eTable 8. Top 10 Loadings Mode 3 ABCD Baseline</b>                 |                |                                                  |
|-----------------------------------------------------------------------|----------------|--------------------------------------------------|
| <b>Variable</b>                                                       | <b>Loading</b> | <b>Description</b>                               |
| famhx_3f_yng_p                                                        | -0.110188197   | # of younger full siblings                       |
| demo_roster_p                                                         | -0.097266808   | How many people are living at your address?      |
| demo_relig_p_Mormon (Church of Jesus Christ of Latter Day Saints/LDS) | -0.092269858   | What is the child's religious preference? Mormon |
| famhx_3a_p                                                            | -0.084591423   | # brother (s)                                    |
| abcd_site_site16                                                      | -0.083199328   | Site ID                                          |
| site_id_l_site16                                                      | -0.083199328   | Site ID                                          |
| site16                                                                | -0.083199328   | Site ID                                          |
| reshist_addr1_elevation                                               | -0.078165796   | Residential history derived elevation 1          |
| famhx_q4k_full_sib_yng2_alc_p__0_not endorsed                         | 0.077713512    | Full sibling-younger Alcohol Problems?           |
| famhx_q4k_full_sib_yng2_alc_p__0_No Problems                          | -0.077713512   | Full sibling-younger Alcohol Problems?           |

| <b>eTable 9. Top 10 Loadings Mode 3 COVID Baseline</b> |                |                                                                                                                                                                                                                                                                                          |
|--------------------------------------------------------|----------------|------------------------------------------------------------------------------------------------------------------------------------------------------------------------------------------------------------------------------------------------------------------------------------------|
| <b>Variable</b>                                        | <b>Loading</b> | <b>Description</b>                                                                                                                                                                                                                                                                       |
| fam_size_cv                                            | -0.32328       | How many people are living at your address? INCLUDE yourself and everyone who is living or staying at your place this week.                                                                                                                                                              |
| child_fall_asleep_time_cv                              | -0.16933       | How long after going to bed does your child usually fall asleep?                                                                                                                                                                                                                         |
| household_ability_cv                                   | -0.1624        | Is your role caring for your child conflicting with your household responsibilities?                                                                                                                                                                                                     |
| school_nutrition_cv                                    | -0.15347       | Did your child get breakfast and/or lunch from your school?                                                                                                                                                                                                                              |
| cv_p_select_language__1                                | 0.153394       | Language selection for assessment, english or spanish                                                                                                                                                                                                                                    |
| social_media_platform_cv                               | -0.14969       | The following questions ask about your use of different forms of media (television, social media, and other internet sources) to check for news related to the coronavirus pandemic in the past week. Which platform did you use the most when checking for news related to coronavirus? |
| screentime_wknd_typical_hr_cv                          | 0.147316       | On a typical day, how much TIME per day do you spend in TOTAL connecting with friends digitally (all forms listed above included)?                                                                                                                                                       |
| fam_actions_cv__3                                      | 0.146007       | In the past week our family has (check all that apply; by your choice rather than because it's closed): 3 Avoided gatherings of 10 people or more                                                                                                                                        |
| questionnaire_privacy_cv                               | -0.14577       | How much privacy did you have while you were completing this questionnaire today?                                                                                                                                                                                                        |
| homework_help_time_cv                                  | -0.13871       | How many hours per day did you spend helping your child access or complete their schoolwork?                                                                                                                                                                                             |

**eTable 10. Top 10 Loadings Mode 4 ABCD Baseline**

| Variable                                     | Loading  | Description                                                 |
|----------------------------------------------|----------|-------------------------------------------------------------|
| sex_at_birth_F                               | -0.09357 | Sex at Birth                                                |
| demo_sex_p_Female                            | -0.09357 | Sex at Birth                                                |
| female_yes                                   | -0.09357 | Subject is female?                                          |
| female_no                                    | 0.093572 | Subject is female?                                          |
| sex_at_birth_M                               | 0.093572 | Sex at Birth                                                |
| pubertdev_ss_male_category2_nt_p             | 0.093539 | Puberty Developmental Scale; Number Total Questions; Parent |
| demo_sex_p_Male                              | 0.093495 | Sex at Birth                                                |
| pubertdev_ss_male_category2_nt               | 0.093462 | Puberty Developmental Scale; Number Total Questions; Child  |
| demo_gender_id_p_Female                      | -0.09338 | What is the child's current gender identity?                |
| biospec_hormone_sal_sex_Pink/Purple (female) | -0.09333 | Hormone saliva sample tube cap color                        |

**eTable 11. Top 10 Loadings Mode 4 COVID Baseline**

| Variable                   | Loading  | Description                                                                                                                                                                                                                                                                              |
|----------------------------|----------|------------------------------------------------------------------------------------------------------------------------------------------------------------------------------------------------------------------------------------------------------------------------------------------|
| mctq_fd_btime_cv           | -0.24235 | Report on your typical sleep behavior over the past week. : I go to bed at:                                                                                                                                                                                                              |
| screentime_12_wknd_hr_cv   | -0.23343 | Visit social media apps (e.g., Snapchat, Facebook, Twitter, Instagram, TikTok, etc.)? (Do not include time spent editing photos or videos to post on social media.)                                                                                                                      |
| mctq_fd_time_asleep_cv     | -0.23107 | Report on your typical sleep behavior over the past week. : I actually start trying to fall asleep at:                                                                                                                                                                                   |
| mctq_fd_wake_up_time_cv    | -0.20997 | Report on your typical sleep behavior over the past week. : I wake up at:                                                                                                                                                                                                                |
| screentime_10_wknd_hr_cv   | 0.200653 | Play multiplayer video games on a computer, console, phone, or other device (Xbox, PlayStation, iPad, AppleTV) where you can interact with others in the game?                                                                                                                           |
| child_social_media_time_cv | -0.18905 | Social media (including Facebook Youtube TikTok Snapchat etc) :Hours (round 1 and 2)                                                                                                                                                                                                     |
| iep_cv                     | 0.18308  | Does your child have an IEP or 504 plan?                                                                                                                                                                                                                                                 |
| screentime_9_wknd_hr_cv    | 0.167436 | Play single-player video games on a computer, console, phone or other device (Xbox, PlayStation, iPad, AppleTV)?                                                                                                                                                                         |
| social_media_platform_cv   | 0.16416  | The following questions ask about your use of different forms of media (television, social media, and other internet sources) to check for news related to the coronavirus pandemic in the past week. Which platform did you use the most when checking for news related to coronavirus? |
| parent_monitor_q4_y_cv     | -0.15316 | About your life over the past week:How often do you talk to your mom/dad or guardian about your plans for the coming day, such as your plans about what will happen at school (or school-at-home) or what you are going to do?                                                           |

**eTable 12. Top 10 Loadings Mode 5 ABCD Baseline**

| Variable                            | Loading  | Description                                                                                                                 |
|-------------------------------------|----------|-----------------------------------------------------------------------------------------------------------------------------|
| sports_activity_ss_read_p           | 0.087124 | About how many hours per week does your child spend reading for pleasure                                                    |
| sports_activity_read_years_p        | 0.086364 | Reading Leisure: For how many years has your child read for pleasure?                                                       |
| sports_activity_ss_read_years_p     | 0.086364 | For how many years has your child read for pleasure?                                                                        |
| sports_activity_read_p_No           | -0.07757 | Does your child read for pleasure?                                                                                          |
| sports_activity_read_p_Yes          | 0.077525 | Does your child read for pleasure?                                                                                          |
| scrn_hr_read                        | 0.069203 | Enjoys reading?                                                                                                             |
| screentime_2_hours_p                | -0.06752 | On a typical WEEKEND DAY, how much TIME does your child spend on a computer, cellphone, tablet, or other electronic device? |
| genetic_ancestry_factor_african     | 0.066372 | Proportion of African ancestry                                                                                              |
| screentime_ss_weekday               | -0.0662  | Total Weekday Screentime                                                                                                    |
| demo_prnt_race_a_p__10_not endorsed | 0.06593  | What race do you consider yourself to be?                                                                                   |

**eTable 13. Top 10 Loadings Mode 5 COVID Baseline**

| Variable                 | Loading  | Description                                                                                                                                                                                                                                                                                                                                         |
|--------------------------|----------|-----------------------------------------------------------------------------------------------------------------------------------------------------------------------------------------------------------------------------------------------------------------------------------------------------------------------------------------------------|
| screentime_10_wknd_hr_cv | -0.20743 | Play multiplayer video games on a computer, console, phone, or other device (Xbox, PlayStation, iPad, AppleTV) where you can interact with others in the game?                                                                                                                                                                                      |
| pets_cv                  | -0.19337 | Do you currently have any pets?                                                                                                                                                                                                                                                                                                                     |
| child_gaming_time_cv     | -0.17389 | Through multiple-player video games : hours ( Question for round 1 and 2)                                                                                                                                                                                                                                                                           |
| pet_identify_cv__1       | -0.16382 | Please select all the pets that you currently have: 1, Dog                                                                                                                                                                                                                                                                                          |
| extra_material_cv        | 0.158631 | Did you or your child supplement the educational materials provided by the school with other sources (e.g. Khan Academy)?                                                                                                                                                                                                                           |
| child_avg_elec_time_cv   | -0.14978 | On an average day this week how much Hours per day does your child spend in TOTAL on a computer cell phone tablet iPod or other electronic device? Do NOT include time spent on school related work but do include watching TV shows or videos texting or chatting playing games or visiting social networking sites? (Facebook Twitter Instagram). |
| screentime_9_wknd_hr_cv  | -0.1458  | Play single-player video games on a computer, console, phone or other device (Xbox, PlayStation, iPad, AppleTV)?                                                                                                                                                                                                                                    |
| screentime_wknd_hr_cv    | -0.14244 | On a typical day, how much TIME per day do you spend in TOTAL on a computer, phone, tablet, iPod, or other device or video game? (Do NOT include time spent on school work)                                                                                                                                                                         |
| school_prep_cv           | 0.140756 | How prepared do you think your child will be for next school year?                                                                                                                                                                                                                                                                                  |
| child_sched_cv           | 0.129826 | I have designed a daily schedule for my child while school is out                                                                                                                                                                                                                                                                                   |

**eTable 14. Top 10 Loadings Mode 6 ABCD Baseline**

| <b>Variable</b>                | <b>Loading</b> | <b>Description</b>                                                        |
|--------------------------------|----------------|---------------------------------------------------------------------------|
| demo_gender_id_p_Male          | 0.084927       | What is the child's current gender identity?                              |
| pubertdev_sex_Female           | -0.0849        | Do you consider yourself male or female?                                  |
| pubertdev_sex_Male             | 0.084793       | Do you consider yourself male or female?                                  |
| pubertdev_ss_male_cat_nt       | 0.084793       | Pubertal Developmental Scale Youth, Male Category: Number Total Questions |
| pubertdev_ss_male_category2_nt | 0.084776       | Puberty Developmental Scale; Number Total Questions                       |
| demo_sex_p_Male                | 0.084736       | Sex at Birth                                                              |
| female_yes                     | -0.08466       | Subject is female?                                                        |
| sex_at_birth_F                 | -0.08466       | Sex at Birth                                                              |
| demo_sex_p_Female              | -0.08466       | Sex at Birth                                                              |
| female_no                      | 0.084655       | Subject is female?                                                        |

**eTable 15. Top 10 Loadings Mode 6 COVID Baseline**

| <b>Variable</b>          | <b>Loading</b> | <b>Description</b>                                                                                                                                                                                      |
|--------------------------|----------------|---------------------------------------------------------------------------------------------------------------------------------------------------------------------------------------------------------|
| child_gaming_time_cv     | 0.198183       | Through multiple-player video games : hours ( Question for round 1 and 2)                                                                                                                               |
| child_separate_cv        | -0.18008       | Is your child having a hard time being separated from anyone close due to the impact of coronavirus? Le cuesta a su hijo/a estar separado/separada de alguien cercano debido al impacto del coronavirus |
| screentime_10_wknd_hr_cv | 0.172156       | Play multiplayer video games on a computer, console, phone, or other device (Xbox, PlayStation, iPad, AppleTV) where you can interact with others in the game?                                          |
| separate_people_cv__5    | -0.16825       | Check all that apply(child had a hard time being separated due to the impact of coronavirus): 5 Friend(s)                                                                                               |
| mctq_fd_min_to_sleep_cv  | -0.16373       | Report on your typical sleep behavior over the past week. : I need minutes to fall asleep.                                                                                                              |
| cv_p_select_language__1  | -0.15036       | Language selection for assessment, english or spanish                                                                                                                                                   |
| pstr_unable_control_cv   | -0.14831       | In the last month, how often have you felt that you were unable to control the important things in your life?                                                                                           |
| mctq_fd_min_to_get_up_cv | -0.14768       | Report on your typical sleep behavior over the past week. : After minutes I get up.                                                                                                                     |
| pstr_overcome_p_cv       | -0.14308       | In the last month, how often have you felt difficulties were piling up so high that you could not overcome them?                                                                                        |
| separate_people_cv__1    | -0.13372       | Check all that apply(child had a hard time being separated due to the impact of coronavirus): 1 Parent/guardian                                                                                         |



**eTable 16. Top 10 Loadings Mode 7 ABCD Baseline**

| <b>Variable</b>                   | <b>Loading</b> | <b>Description</b>                                                                        |
|-----------------------------------|----------------|-------------------------------------------------------------------------------------------|
| scrn_hr_sport                     | 0.074675       | Enjoys playing sports?                                                                    |
| sports_activity_ss_lmusic_p       | 0.065832       | Music About how many hours per week does your child spend listening to music for pleasure |
| upps_ss_sensation Seeking         | 0.061212       | UPPS-P for Children Short Form (ABCD-version), Sensation Seeking: Number Total Questions  |
| sports_activity_lmusic_p_Yes      | 0.057416       | Does your child listen to music for pleasure?                                             |
| sports_activity_lmusic_p_No       | -0.05737       | Does your child listen to music for pleasure?                                             |
| sports_activity_ss_lmusic_years_p | 0.055583       | For how many years has your child listened to music for pleasure?                         |
| sports_activity_lmusic_years_p    | 0.055583       | For how many years has your child listened to music for pleasure?                         |
| snellen_aid_No                    | 0.054744       | Do you wear any necessary corrective aids (glasses, contacts)?                            |
| snellen_aid_Yes                   | -0.05433       | Do you wear any necessary corrective aids (glasses, contacts)?                            |
| sports_activity_ss_soc_nyr_p      | 0.05154        | Soccer : For how many years did your child participate in this activity?                  |

**eTable 17. Top 10 Loadings Mode 7 COVID Baseline**

| <b>Variable</b>           | <b>Loading</b> | <b>Description</b>                                                                                                                                                                                                                                                                                |
|---------------------------|----------------|---------------------------------------------------------------------------------------------------------------------------------------------------------------------------------------------------------------------------------------------------------------------------------------------------|
| outdoor_act_cv            | 0.245184       | Over the past week: I did outdoor activities...                                                                                                                                                                                                                                                   |
| walk_10_min_per_day_cv    | 0.224394       | During the past week, on how many days did you walk for at least 10 minutes at a time?                                                                                                                                                                                                            |
| physical_activities_hr_cv | 0.222292       | During the past week, on how many days did you do moderate or vigorous physical activities like heavy lifting, running, aerobics, or bicycling? (Moderate or vigorous physical activities refer to activities that take moderate to hard physical effort and make you breathe harder than normal) |
| demo_exercise_cv          | 0.214242       | I exercise or play outside                                                                                                                                                                                                                                                                        |
| separate_people_cv 7      | 0.149635       | Check all that apply(child had a hard time being separated due to the impact of coronavirus): 7 Coach(es)                                                                                                                                                                                         |
| pets_cv                   | 0.147335       | Do you currently have any pets?                                                                                                                                                                                                                                                                   |
| talk_cancel_cv            | 0.130911       | Cancellation of school and other events                                                                                                                                                                                                                                                           |
| school_prep_cv            | -0.13089       | How prepared do you think your child will be for next school year?                                                                                                                                                                                                                                |
| p_cope_cv 2               | 0.130296       | In the past week to cope have you done any of the following? (check all that apply) : 2 Participated in a neighborhood social distance activity (such as decorated windows or driveway singing from balcony or porch)                                                                             |
| talk_vuln_cv              | 0.124361       | Protecting the elderly or other vulnerable people                                                                                                                                                                                                                                                 |

| <b>eTable 18. Top 10 Loadings Mode 8 ABCD Baseline</b> |                |                                                                                    |
|--------------------------------------------------------|----------------|------------------------------------------------------------------------------------|
| <b>Variable</b>                                        | <b>Loading</b> | <b>Description</b>                                                                 |
| ksads_back_c_live_full_time_p_No                       | 0.140749909    | Does your child live with you full time?                                           |
| ksads_back_c_live_full_time_p_Yes                      | -0.140484069   | Does your child live with you full time?                                           |
| ksads_back_c_guard_p__2_not endorsed                   | -0.122021553   | Who else does your child live with at least part of the time?                      |
| ksads_back_c_guard_p__2_Biological Father              | 0.122021553    | Who else does your child live with at least part of the time?                      |
| demo_child_time_p_No                                   | -0.1072942     | Is there another household in which the child spends a significant amount of time? |
| demo_child_time_p_Yes                                  | 0.106382519    | Is there another household in which the child spends a significant amount of time? |
| demo_prim_p_ Biological Mother                         | -0.093736021   | You are the:                                                                       |
| devhx_1_p_Yes                                          | -0.092715747   | Are you the child's biological mother?                                             |
| devhx_1_p_No                                           | 0.092715747    | Are you the child's biological mother?                                             |
| demo_prnt_marital_p_Divorced                           | 0.083567335    | Marital Status                                                                     |

| <b>eTable 19. Top 10 Loadings Mode 8 COVID Baseline</b> |                |                                                                                                                                                                             |
|---------------------------------------------------------|----------------|-----------------------------------------------------------------------------------------------------------------------------------------------------------------------------|
| <b>Variable</b>                                         | <b>Loading</b> | <b>Description</b>                                                                                                                                                          |
| percent_live_cv                                         | -0.30096591    | What percent of the time did your child live with you?                                                                                                                      |
| custody_cv                                              | 0.261055156    | Has your custody situation changed since the coronavirus/COVID-19 crisis?                                                                                                   |
| prim_cv                                                 | 0.209826774    | You are the: Usted es:                                                                                                                                                      |
| separate_people_cv__1                                   | 0.179599084    | Check all that apply(child had a hard time being separated due to the impact of coronavirus): 1 Parent/guardian                                                             |
| screentime_7_wknd_hr_cv                                 | -0.164114358   | Watch "or stream" movies, videos or TV shows? (such as Hulu, Netflix, Amazon, YouTube, Twitch)                                                                              |
| screentime_wknd_hr_cv                                   | -0.163880752   | On a typical day, how much TIME per day do you spend in TOTAL on a computer, phone, tablet, iPod, or other device or video game? (Do NOT include time spent on school work) |
| fam_size_cv                                             | -0.145024177   | How many people are living at your address? INCLUDE yourself and everyone who is living or staying at your place this week.                                                 |
| child_gaming_time_cv                                    | -0.137626603   | Through multiple-player video games : hours ( Question for round 1 and 2)                                                                                                   |
| p_life_changed_cv                                       | -0.134544998   | How much do you think your life has changed due to the coronavirus (COVID-19)                                                                                               |
| screentime_10_wknd_hr_cv                                | -0.132179868   | Play multiplayer video games on a computer, console, phone, or other device (Xbox, PlayStation, iPad, AppleTV) where you can interact with others in the game?              |

| <b>eTable 20. Top 10 Loadings Mode 9 ABCD Baseline</b> |                |                                                                                                                                                                                                     |
|--------------------------------------------------------|----------------|-----------------------------------------------------------------------------------------------------------------------------------------------------------------------------------------------------|
| <b>Variable</b>                                        | <b>Loading</b> | <b>Description</b>                                                                                                                                                                                  |
| devhx_ss_8_cigs_per_day_p                              | 0.082012285    | Tobacco? How many times per day?                                                                                                                                                                    |
| devhx_8_tobacco_p Yes                                  | 0.080792224    | Before knowing of pregnancy. Tobacco?                                                                                                                                                               |
| demo_fam_exp2_p_No                                     | -0.073909456   | In the past 12 months, has there been a time when you and your immediate family experienced any of the following: Were without telephone service because you could not afford it?                   |
| demo_fam_exp2_p_Yes                                    | 0.072540625    | In the past 12 months, has there been a time when you and your immediate family experienced any of the following: Were without telephone service because you could not afford it?                   |
| demo_fam_exp1_p_No                                     | -0.068489008   | In the past 12 months, has there been a time when you and your immediate family experienced any of the following: Needed food but couldn't afford to buy it or couldn't afford to go out to get it? |
| pubertdev_sex Female                                   | -0.067850488   | Do you consider yourself male or female?                                                                                                                                                            |
| pubertdev_ss_male_category2_nt                         | 0.067721417    | Puberty Developmental Scale; Number Total Questions; Child                                                                                                                                          |
| pubertdev_ss_male_category2_nt_p                       | 0.06770315     | Puberty Developmental Scale; Number Total Questions; Parent                                                                                                                                         |
| demo_sex_p_Female                                      | -0.06765127    | Sex at Birth                                                                                                                                                                                        |
| sex_at_birth_F                                         | -0.06765127    | Sex at Birth                                                                                                                                                                                        |

| <b>eTable 21. Top 10 Loadings Mode 9 COVID Baseline</b> |                |                                                                                                           |
|---------------------------------------------------------|----------------|-----------------------------------------------------------------------------------------------------------|
| <b>Variable</b>                                         | <b>Loading</b> | <b>Description</b>                                                                                        |
| su_p_cig_loc_cv__4                                      | 0.172052411    | Where did you use cigarettes? (check all that apply) : 4 Outside                                          |
| pstr_confidence_p_cv                                    | 0.171145687    | In the last month, how often have you felt confident about your ability to handle your personal problems? |
| fam_exp2_cv                                             | 0.163871159    | Needed food but couldn't afford to buy it or couldn't afford to get out to get it?                        |
| fam_exp3_cv                                             | 0.159194484    | Were without telephone service because you could not afford it?                                           |
| tool_access_cv                                          | -0.149671902   | Does your child have access to the things needed(such as a laptop) to do their school work at home?       |
| fam_exp4_cv                                             | 0.144376869    | Didn't pay the full amount of the rent or mortgage because you could not afford it?                       |
| su_p_cig_loc_cv__2                                      | 0.136976355    | Where did you use cigarettes? (check all that apply) : 2 Balcony / deck                                   |
| child_fall_asleep_time_cv                               | -0.136414421   | How long after going to bed does your child usually fall asleep?                                          |
| pstr_way_p_cv                                           | 0.134096654    | In the last month, how often have you felt that things were going your way?                               |
| internet_access_cv                                      | -0.131555766   | Do you have internet access at home?                                                                      |

## eReferences

1. Garavan H, Bartsch H, Conway K, et al. Recruiting the ABCD sample: Design considerations and procedures. *Developmental Cognitive Neuroscience*. 2018/08/01/ 2018;32:16-22. doi:<https://doi.org/10.1016/j.dcn.2018.04.004>
2. Barch DM, Albaugh MD, Avenevoli S, et al. Demographic, physical and mental health assessments in the adolescent brain and cognitive development study: Rationale and description. *Dev Cogn Neurosci*. Aug 2018;32:55-66. doi:10.1016/j.dcn.2017.10.010
3. Zucker RA, Gonzalez R, Feldstein Ewing SW, et al. Assessment of culture and environment in the Adolescent Brain and Cognitive Development Study: Rationale, description of measures, and early data. *Dev Cogn Neurosci*. Aug 2018;32:107-120. doi:10.1016/j.dcn.2018.03.004
4. Luciana M, Bjork JM, Nagel BJ, et al. Adolescent neurocognitive development and impacts of substance use: Overview of the adolescent brain cognitive development (ABCD) baseline neurocognition battery. *Dev Cogn Neurosci*. Aug 2018;32:67-79. doi:10.1016/j.dcn.2018.02.006
5. Lisdahl KM, Sher KJ, Conway KP, et al. Adolescent brain cognitive development (ABCD) study: Overview of substance use assessment methods. *Dev Cogn Neurosci*. Aug 2018;32:80-96. doi:10.1016/j.dcn.2018.02.007
6. Volkow ND, Koob GF, Croyle RT, et al. The conception of the ABCD study: From substance use to a broad NIH collaboration. *Dev Cogn Neurosci*. Aug 2018;32:4-7. doi:10.1016/j.dcn.2017.10.002
7. Schurz M, Uddin LQ, Kanske P, et al. Variability in Brain Structure and Function Reflects Lack of Peer Support. *Cereb Cortex*. Aug 26 2021;31(10):4612-4627. doi:10.1093/cercor/bhab109
8. Clemens B, Derntl B, Smith E, et al. Predictive Pattern Classification Can Distinguish Gender Identity Subtypes from Behavior and Brain Imaging. *Cereb Cortex*. May 14 2020;30(5):2755-2765. doi:10.1093/cercor/bhz272
9. Smith SM, Nichols TE, Vidaurre D, et al. A positive-negative mode of population covariation links brain connectivity, demographics and behavior. Brief Communication. *Nat Neurosci*. 11/print 2015;18(11):1565-1567. doi:10.1038/nn.4125  
<http://www.nature.com/neuro/journal/v18/n11/abs/nn.4125.html#supplementary-information>
10. Elliott LT, Sharp K, Alfaro-Almagro F, et al. Genome-wide association studies of brain imaging phenotypes in UK Biobank. *Nature*. Oct 2018;562(7726):210-216. doi:10.1038/s41586-018-0571-7
11. Modabbernia A, Janiri D, Doucet GE, Reichenberg A, Frangou S. Multivariate Patterns of Brain-Behavior-Environment Associations in the Adolescent Brain and Cognitive Development Study. *Biol Psychiatry*. Mar 1 2021;89(5):510-520. doi:10.1016/j.biopsych.2020.08.014
12. A Z, A C. *Feature Engineering for Machine Learning*. O'Reilly Media Inc; 2018.
13. M K, K J. *Feature Engineering and Selection*. CRC Press, Taylor & Francis Group; 2020.
14. Wang HT, Smallwood J, Mourao-Miranda J, et al. Finding the needle in a high-dimensional haystack: Canonical correlation analysis for neuroscientists. *Neuroimage*. Apr 8 2020;216:116745. doi:10.1016/j.neuroimage.2020.116745
15. Miller KL, Alfaro-Almagro F, Bangerter NK, et al. Multimodal population brain imaging in the UK Biobank prospective epidemiological study. *Nat Neurosci*. Nov 2016;19(11):1523-1536. doi:10.1038/nn.4393

16. Helmer M, Warrington S, Mohammadi-Nejad A-R, et al. On stability of Canonical Correlation Analysis and Partial Least Squares with application to brain-behavior associations. *bioRxiv*. 2020:2020.08.25.265546. doi:10.1101/2020.08.25.265546
